# UP-DOWN cortical dynamics reflect state transitions in a bistable balanced network

Daniel Jercog <sup>1</sup>, Alex Roxin <sup>2</sup>, Peter Barthó <sup>3</sup>, Artur Luczak <sup>4</sup>,  
Albert Compte <sup>\*1</sup> & Jaime de la Rocha <sup>\*1</sup>

1. Institut d'Investigacions Biomèdiques August Pi i Sunyer (IDIBAPS), Barcelona, Spain.

2. Centre de Recerca Matemàtica, Bellaterra, Spain.

3. MTA TTK NAP B Research Group of Sleep Oscillations, Budapest, Hungary.

4. Canadian Center for Behavioural Neuroscience, University of Lethbridge, Lethbridge, AB, Canada.

(\*Equal contribution).

Correspondence: [daniel.jercog@inserm.fr](mailto:daniel.jercog@inserm.fr) (D.J.); [jrochav@clinic.cat](mailto:jrochav@clinic.cat) (J.R.)

21 **Abstract**

22  
23 In the idling brain, neuronal circuits often exhibit transitions between periods of sustained firing (UP  
24 state) and quiescence (DOWN state). Although these dynamics occur across multiple areas and  
25 behavioral conditions, the underlying mechanisms remain unclear. Here we analyze spontaneous  
26 population activity from the somatosensory cortex of urethane-anesthetized rats. We find that UP and  
27 DOWN periods are variable (i.e. non-rhythmic) and that the population rate shows no significant decay  
28 during UP periods. We build a network model of excitatory (E) and inhibitory (I) neurons that exhibits a  
29 new bistability between a quiescent state and a balanced state of arbitrarily low rate. Fluctuating inputs  
30 trigger state transitions. Adaptation in E cells paradoxically causes a marginal decay of E-rate but a  
31 marked decay of I-rate, a signature of balanced bistability that we validate experimentally. Our findings  
32 provide evidence of a bistable balanced network that exhibits non-rhythmic state transitions when the  
33 brain rests.

34

## 35 Introduction

36 A ubiquitous pattern of spontaneous cortical activity during synchronized brain states consists in the  
37 alternation between periods of tonic firing (UP states) and periods of quiescence (DOWN states)  
38 (Luczak et al., 2007; Steriade et al., 1993a; Timofeev et al., 2001). Cortical UP and DOWN dynamics  
39 take place during slow-wave-sleep (SWS) (Steriade et al., 1993a) and can also be induced by a  
40 number of anesthetics (Steriade et al., 1993a). More recently however, similar synchronous cortical  
41 dynamics have been observed not only in awake rodents during quiescence (Luczak et al., 2007;  
42 Petersen et al., 2003), but also in animals performing a perceptual task, both rodents  
43 (Sachidhanandam et al., 2013; Vyazovskiy et al., 2011) and monkeys (Engel et al., 2013).

44 Spontaneous activity resembling UP and DOWN states has been found in cortical slices *in vitro*  
45 (Cossart et al., 2003; Faselow and Connors, 2010; Mann et al., 2009; Sanchez-Vives and  
46 McCormick, 2000), in slabs (Timofeev et al., 2000) and *in vivo* under extensive thalamic lesions  
47 (Steriade et al., 1993b). This has led to suggest that the underlying mechanism had an intracortical  
48 origin. In such scenario, the standard hypothesis postulates that during UP periods a fatigue cellular  
49 mechanism – e.g. spike frequency adaptation or synaptic short-term depression – decreases network  
50 excitability until the state of tonic firing can no longer be sustained and the cortical network switches  
51 into a DOWN state (Contreras et al., 1996; Sanchez-Vives and McCormick, 2000). During DOWN  
52 periods, in the absence of firing, the fatigue variables recover until the circuit becomes self-excitable  
53 and autonomously transitions into an UP state (Cunningham et al., 2006; Le Bon-Jego and Yuste,  
54 2007; Poskanzer and Yuste, 2011; Sanchez-Vives and McCormick, 2000; Timofeev et al., 2000). This  
55 mechanism of activity dependent negative feedback causing oscillatory UP-DOWN dynamics has  
56 been implemented by several computational models (Bazhenov et al., 2002; Benita et al., 2012; Chen  
57 et al., 2012; Compte et al., 2003b; Hill and Tononi, 2005; Parga and Abbott, 2007). However, although  
58 commonly described as a slow oscillation, the rhythmicity of UP-DOWN dynamics has not been  
59 systematically quantified and seems to depend on the details of the preparation (Chauvette et al.,  
60 2011; Erchova et al., 2002; Lampl et al., 1999; Ruiz-Mejias et al., 2011).

61 Alternatively, there is strong evidence suggesting that UP-DOWN transitions in neocortical  
62 circuits are coupled with activity in other areas. Thalamocortical neurons for instance can  
63 endogenously oscillate at low frequencies (Hughes et al., 2002; McCormick and Pape, 1990), cause  
64 cortical UP states when stimulated (Rigas and Castro-Alamancos, 2007) or modulate the UP-DOWN  
65 dynamics when suppressed (David et al., 2013; Lemieux et al., 2014) and their spontaneous activity  
66 correlates with UP state onset (Contreras and Steriade, 1995; Slézia et al., 2011; Ushimaru et al.,  
67 2012). Moreover, the timing of hippocampal sharp-wave ripples (Battaglia et al., 2004), or basal  
68 ganglia activity (Ushimaru et al., 2012) also tends to precede DOWN to UP transitions. Finally,  
69 intracortical stimulation can effectively cause UP-DOWN transitions (Beltramo et al., 2013; Shu et al.,  
70 2003) even when only a few dozen neurons are stimulated (Stroh et al., 2013). In total, these findings  
71 describe a system whose macroscopic UP-DOWN dynamics are sensitive to temporal fluctuations of

72 both external inputs and local circuit activity. Such a network would in principle generate unpredictable  
73 and therefore irregular UP-DOWN dynamics, since transitions are no longer dependent exclusively on  
74 local cortical internal dynamics.

75 The interplay of fatigue and fluctuations causing transitions between two states has been  
76 theoretically studied in the developing spinal cord (Tabak et al., 2011, 2000), and in the context of UP-  
77 DOWN dynamics mostly in excitatory networks (Holcman and Tsodyks, 2006; Lim and Rinzel, 2010;  
78 Mattia and Sanchez-Vives, 2012; Mejias et al., 2010). Models of spontaneous activity are however  
79 theoretically founded on the balance between excitatory (E) and inhibitory (I) populations (Amit and  
80 Brunel, 1997; van Vreeswijk and Sompolinsky, 1998), a dynamic state that can quantitatively mimic  
81 population spiking activity during desynchronized states (Renart et al., 2010). In spite of this, there is  
82 still no simple EI network model that, building on a balanced state, can exhibit bistability between a  
83 low-rate and a quiescent state (Latham et al., 2000). To develop such a model, we first performed  
84 population recordings of ongoing cortical activity during synchronized brain state epochs in rats under  
85 urethane anesthesia (Détári and Vanderwolf, 1987; Luczak et al., 2007; Murakami et al., 2005;  
86 Whitten et al., 2009). Analysis of multi single-unit spiking dynamics, showed irregular UP and DOWN  
87 periods and no decay of the average rate during UPs. Given these constraints, we built an EI network  
88 model that, capitalizing on the firing threshold non-linearity and the asymmetry of the E and I transfer  
89 functions, exhibited a novel type of bistability with a quiescence (DOWN) and a low-rate state (UP).  
90 External input fluctuations into the network caused the irregular UP-DOWN transitions. Adaptation in E  
91 cells in contrast, did not cause transitions and had a different effect on the E rate in each of the two  
92 states: while it exhibited recovery during DOWN periods, it showed almost no decay during UP periods  
93 due to the balanced nature of the UP dynamics. Our model provides the first EI network that exhibits  
94 stochastic transitions between a silent and a balanced attractor matching the statistics of UP and  
95 DOWN periods and population rate time-courses observed in the cortex.

96

## 97 Results

98 To investigate the mechanisms underlying the generation of spontaneous cortical activity, we recorded  
99 the spiking activity from large populations of neurons (mean $\pm$ SD = 64 $\pm$ 23 cells) in deep layers of  
100 somatosensory cortex of urethane-anesthetized rats (n=7 animals) (Barthó et al., 2004; Luczak et al.,  
101 2009). Because brain state under urethane can vary spontaneously (Détári and Vanderwolf, 1987;  
102 Luczak et al., 2007; Murakami et al., 2005; Whitten et al., 2009), we selected the most clearly  
103 synchronized epochs characterized by the stable presence of high-amplitude, slow fluctuations in  
104 cortical local field potential (LFP) signals (Fig. 1A; see Methods) (Harris and Thiele, 2011; Steriade et  
105 al., 2001). During these epochs, the instantaneous population rate  $R(t)$ , defined from the merge of all  
106 the recorded individual spike trains, displayed alternations between periods of tonic firing and periods  
107 of silence (Luczak et al., 2007), a signature of UP and DOWN states from an extracellular standpoint  
108 (Fig. 1B-C) (Cowan and Wilson, 1994; Sanchez-Vives and McCormick, 2000; Steriade et al., 1993a).  
109 Despite the clear presence of UP and DOWN states, the population activity displayed no clear traces  
110 of rhythmicity as revealed by strongly damped oscillatory structure in both autocorrelograms of LFP  
111 and  $R(t)$  (Fig 1D and 1E, respectively). Motivated by this, we hypothesized that the cortical circuit  
112 might transition between two network states in a random manner (Deco et al., 2009; Mejias et al.,  
113 2010; Mochol et al., 2015). Using a probabilistic hidden semi-Markov model (Chen et al., 2009), we  
114 inferred the instantaneous state of the circuit from the population rate  $R(t)$  by extracting the sequence  
115 of putative UP (U) and DOWN (D) periods (Fig. 1C, Methods).

116

### 117 UP and DOWN duration statistics during synchronized states

118 The statistics of U and D period durations showed skewed gamma-like distributions (Fig. 2A and 2B  
119 right; Supp. Fig 1). The mean duration across different experiments displayed a wide range of values  
120 (Fig. 2B left; mean $\pm$ SD:  $\langle U \rangle = 0.43 \pm 0.19$  s,  $\langle D \rangle = 0.46 \pm 0.1$  s, n=7), whereas the coefficients of variation  
121 CV(U) and CV(D) of U and D periods, defined as the standard deviation divided by the mean of the  
122 period durations within experiments, were systematically high (Fig. 2B middle, mean $\pm$ SD:  
123 CV(U)=0.69 $\pm$ 0.09, CV(D)=0.69 $\pm$ 0.1). The irregularity in the U and D periods did not result from slow  
124 drifts in the mean U or D durations caused by variations of brain state as confirmed by computing the  
125 CV<sub>2</sub> (Holt et al., 1996), a local measure of irregularity that is less affected by slow variations in the  
126 statistics (mean $\pm$ SD: CV<sub>2</sub>(U)=0.86 $\pm$ 0.13, CV<sub>2</sub>(D)=0.75 $\pm$ 0.17; see Methods). The high variability of U  
127 and D periods is consistent with the non-periodicity of the dynamics revealed in the autocorrelation  
128 function (Fig. 1D-E).

129 We then asked whether the lengths of U and D periods were independent, as if the transitions  
130 between the two network states would reset the circuit's memory, or if in contrast they were correlated  
131 by a process impacting the variability of several consecutive periods. We computed the linear cross-

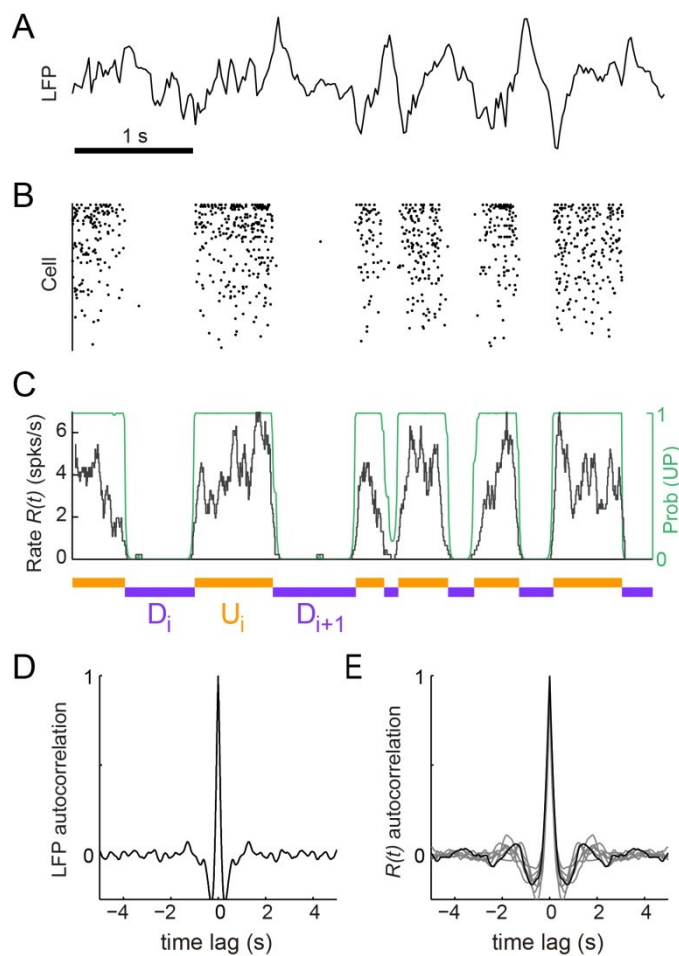

132  
133

134 **Figure 1.** Synchronized brain activity under urethane anesthesia in the rat somatosensory cortex and the detection of  
135 putative UP and DOWN periods. **(A).** Local field potential during 5 s of synchronized state displaying high-amplitude slow  
136 fluctuations. **(B)** Population raster of 92 simultaneously recorded single units exhibiting the alternation between periods of  
137 tonic spiking activity and periods of neural quiescence (cells sorted based on mean firing rate). **(C)** Instantaneous population  
138 rate  $R(t)$  (grey) is used to identify putative U (orange) and D (purple) periods. The detection algorithm is based on fitting a  
139 Hidden Markov Model (HMM) and computing the posterior probability of the hidden state being in an UP state (green) (see  
140 methods). **(D)** Average autocorrelogram of LFP (20-s windows) for one example experiment. **(E)** Average autocorrelogram of  
141  $R(t)$  for different ( $n=7$ ) experiments (example experiment in black).

142

143

144 correlation  $Corr(U_i, D_{i+k})$  (Fig. 2C left, for  $k=0$ ) between pairs of periods separated in the D-U  
145 sequence by a lag  $k$  (Fig. 2C, right). The cross-correlation  $Corr(U_i, D_{i+k})$  displayed consistently non-  
146 zero values for  $k=0$  and  $k=1$  (mean $\pm$ SD:  $0.21\pm 0.09$ ,  $0.17\pm 0.09$ , respectively; significant cross-  
147 correlation in 6/7 animals,  $P<0.05$  permutation test), whereas remained close to zero for the rest of  
148 lags, showing that period duration relationship is limited to adjacent periods (Fig 2C-D). The positive  
149 correlation between adjacent periods was not due to slow changes in their duration, as we corrected  
150 by the correlation obtained from surrogate D-U sequences obtained from shuffling the original  
151 sequence within 30 second windows (see Methods). Positive correlations between consecutive  
152 periods of activity and silence can be generated when fluctuation driven transitions are combined with

153 an adaptive process such as activity-dependent adaptation currents (Lim and Rinzel, 2010; Tabak et  
 154 al., 2000): if a fluctuation terminates a U period prematurely without much build-up in adaptation, the  
 155 consecutive D period also tends to be shorter as there is little adaptation to recover from. However, a  
 156 major role of adaptation currents in dictating UP-DOWN dynamics (Compte et al., 2003b) seems at  
 157 odds with the lack of rhythmicity and the highly variable U and D durations, indicative of a stochastic  
 158 mechanism causing the transitions between network states.

159  
 160

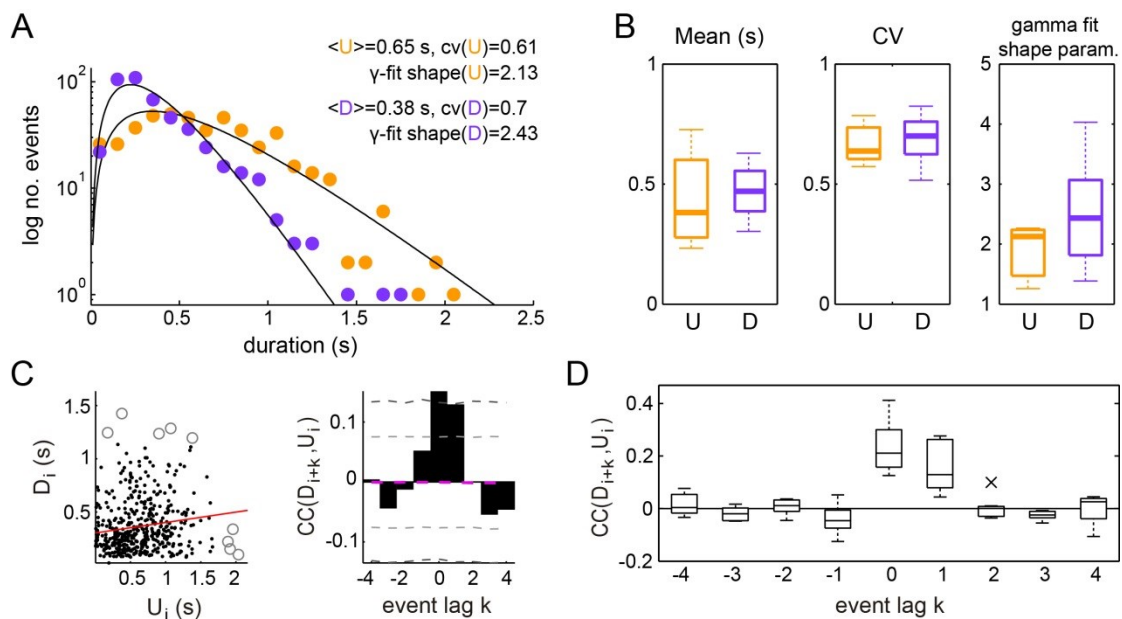

161  
 162  
 163 **Figure 2. Statistics of U and D periods during synchronized brain activity. (A)** Distribution of U and D durations for one  
 164 example experiment (same as Fig 1). Inset shows the mean and coefficient of variation (CV) of U and D durations. **(B)**  
 165 Summary of period duration mean (left) and CV (right) across experiments (n=7 rats). While average durations are quite  
 166 heterogeneous across experiments, the period duration variability is consistently large. **(C)** Left: D duration ( $D_i$ ) vs the  
 167 consecutive U duration ( $U_i$ ) exhibit weak but significant serial correlation (circle marks showing values away than 3 standard  
 168 deviations of the mean, were discarded for correlation analysis; red line showing linear regression). Right: Cross-correlogram  
 169 between the  $D_i$  and  $U_i$  sequences for different lags ( $k$ ) in a single experiment. Magenta dashed line represent the mean cross-  
 170 correlogram from a local shuffled (see Methods). Light (dark) grey dashed line showing 95% C.I. point-wise (global) error  
 171 bands. **(D)** Summary of cross-correlation analysis for the different experiments, displaying consistent positive correlations  
 172 across experiments for lags  $k=0$  and  $k=1$ .

173

## 174 Spiking activity during UP and DOWN states

175 We next searched for more direct evidence of an adaptive process by examining the time course of  
 176 the population firing rate  $R(t)$  during U and D periods (see Fig. 1C; see Methods). The mean firing rate  
 177 in U periods was low (mean $\pm$ SD: 3.72 $\pm$ 0.9 spikes/s, n=7). Moreover, D periods displayed occasional  
 178 spiking (mean $\pm$ SD rate 0.018 $\pm$ 0.007 spikes/s; see e.g. Fig. 3A-B and Supp. Fig. S2), in contrast with  
 179 the idea that DOWN periods do not display spiking activity (Chauvette et al., 2010), but see (Compte

180 et al., 2003b). Thus, our hypothesis was that adaptation currents, if present, would induce a decay in  
 181  $R(t)$  during Us and an increase during Ds, and this impact on  $R(t)$  dynamics should be more evident  
 182 during longer periods due to a larger accumulation (during Us) or recovery (during Ds) of the  
 183 adaptation. For each experiment, we aligned the rate  $R(t)$  at the DOWN-to-UP (DU) and UP-to-DOWN  
 184 (UD) transition times (Fig. 3A). We then computed the average rates  $R_{DU}(\tau)$  and  $R_{UD}(\tau)$  across all DU  
 185 and UD transitions, respectively, with  $\tau = 0$  representing the transition time (Fig. 3B; mean across  
 186 experiments = 598 transitions; range 472-768). Because Us and Ds had different durations, we  
 187 selected long periods (U, D > 0.5 s) and compared  $R_{DU}(\tau)$  and  $R_{UD}(\tau)$  at the beginning and end of  
 188 each period (mean number of Us 181, range 61-307; Ds 202, range 55-331). To specifically assess a  
 189 change in rate during the U period, we compared the average  $R_{DU}(\tau)$  in the time window  $\tau = (50, 200)$   
 190 ms (beginning of U) with the average  $R_{UD}(\tau)$  in the window  $\tau = (-200, -50)$  ms (end of U), which we  
 191  
 192  
 193  
 194

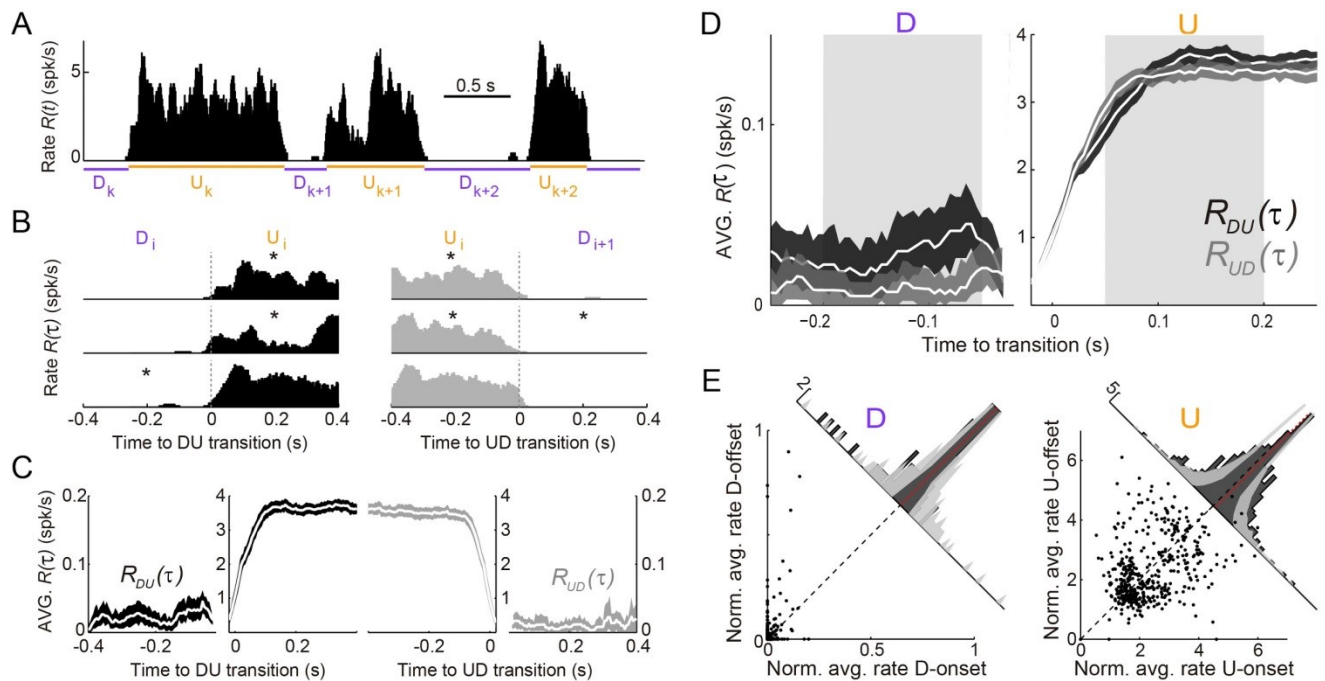

195  
 196  
 197 **Figure 3. Population spiking statistics during U and D periods.** (A) Example of instantaneous population rate  $R(t)$  with U and  
 198 D detected periods (as in Fig.1). (B-C) Each U period is aligned at the DU (B, left) and UD (B, right) transition times in order  
 199 to compute the instantaneous population rate averaged across transitions  $R_{DU}(\tau)$  (C, dark grey) and  $R_{UD}(\tau)$  (C, light grey),  
 200 respectively. Only periods longer than 0.5 s (asterisks in B) were included in the average. (D) Comparison of population rate  
 201 at the onset and offset of Us and Ds done by overlaying  $R_{DU}(\tau)$  and a time-reversed  $R_{UD}(\tau)$ . Onset and offset windows  
 202 defined during D and U periods (shaded) were used to test significance of changes in the rate. (E) Normalized firing rates  
 203 from all individual neurons (448 cells from n=7 animals) during onset and offset windows. Left: D periods. Right: U periods.  
 204 Average across cells is shown in red. Gray bands show 95% C.I. of the histograms obtained from onset-offset shuffled data  
 205 (see Methods).



206 referred to as U-onset and U-offset windows, respectively. The windows were chosen 50 ms away  
207 from  $\tau = 0$  to avoid the transient change due to the state transitions (Fig. 3C-D). We found no  
208 significant mean difference between population average rate at U-onset and U-offset windows across  
209 our experiments (mean $\pm$ SD onset minus offset population rate  $0.04 \pm 0.40$  spikes/s,  $P=1$ , Wilcoxon  
210 signed rank,  $n=7$  animals). The equivalent analysis performed on D periods yielded a small but  
211 significant mean increase in the population rate between the D-onset and D-offset windows (mean $\pm$ SD  
212  $-0.014 \pm 0.013$  spikes/s,  $P=0.047$ , Wilcoxon signed rank test). To examine in more detail the lack of  
213 population rate change during Us, we looked at the modulation of individual neuron rates normalized  
214 by the overall temporal average of each unit (Fig. 3E). We found that the change between U-onset and  
215 U-offset averaged across all our neurons ( $n=448$  cells) was not significantly different from zero (Fig.  
216 3E right, mean $\pm$ SD of the onset vs offset difference of normalized rates  $0.057 \pm 1.163$ ,  $P=0.12$ ,  
217 Wilcoxon signed rank test) but that the recovery during D periods was significant (Fig. 3E left;  
218 mean $\pm$ SD  $-0.015 \pm 0.087$ ,  $P=0.0002$ , Wilcoxon signed rank test). Some individual neurons however  
219 did show a significant modulation between U-onset and U-offset, but the decrease found in a fraction  
220 of the neurons was compensated with a comparable increase in another fraction of neurons (Fig. 3E  
221 right). Thus, at the population level, spiking activity during U periods displayed a sustained time course  
222 with no significant traces of rate adaptation.

223

## 224 **Rate model for UP and DOWN dynamics**

225 To understand the network and cellular mechanisms underlying the generation of stochastic U-D  
226 dynamics, showing U-D serial correlations and sustained rates during U periods, we analyzed a  
227 computational rate model composed of an excitatory (E) population recurrently coupled with an  
228 inhibitory (I) population (Latham et al., 2000; Ozeki et al., 2009; Tsodyks et al., 1997; Wilson and  
229 Cowan, 1972). The excitatory-inhibitory (EI) network model described the dynamics of the mean  
230 instantaneous rates  $r_E$  and  $r_I$  of each population in the presence of fluctuating external inputs. In  
231 addition, the E population included an adaptation mechanism, an additive hyperpolarizing current  $a$   
232 that grew linearly with the rate  $r_E$  (Fig. 4A; see Methods). We did not consider adaptation in the  
233 inhibitory population for simplicity, and because inhibitory neurons show little or no spike-frequency  
234 adaptation when depolarized with injected current (McCormick et al., 1985). Our aim was to search for  
235 a regime in which, in the absence of adaptation and external input fluctuations, the network exhibited  
236 bistability between a quiescent (D) and a low-rate state (U) fixed point. Although bistability in low-  
237 dimensional EI networks has been described since the seminal work of Wilson & Cowan (1972),  
238 previous models primarily sought to explain bistability between a low-rate and a high-rate state, and  
239 exploited the combination of expansive and contractive non-linearities produced by the transfer  
240 function (Amit and Brunel, 1997; Renart et al., 2007; Wilson and Cowan, 1972), short-term synaptic  
241 plasticity (Hansel and Mato, 2013; Mongillo et al., 2008) or the divisive effect inhibitory conductances

242 (Latham et al., 2000) (see Discussion). We found that bistability between D and U states can be  
 243 robustly obtained solely using the expansive nonlinearity of the transfer function caused by the spiking  
 244 threshold. Given this, we choose the simplest possible transfer function with a threshold: a threshold-  
 245 linear function (Fig.4B, see Methods). Our choice to only use an expansive threshold non-linearity  
 246 constrained strongly the way in which the network could exhibit bistability as can be deduced by  
 247 plotting the nullclines of the rates  $r_E$  and  $r_I$  (Fig. 4C): only when the I nullcline was shifted to the right  
 248  
 249

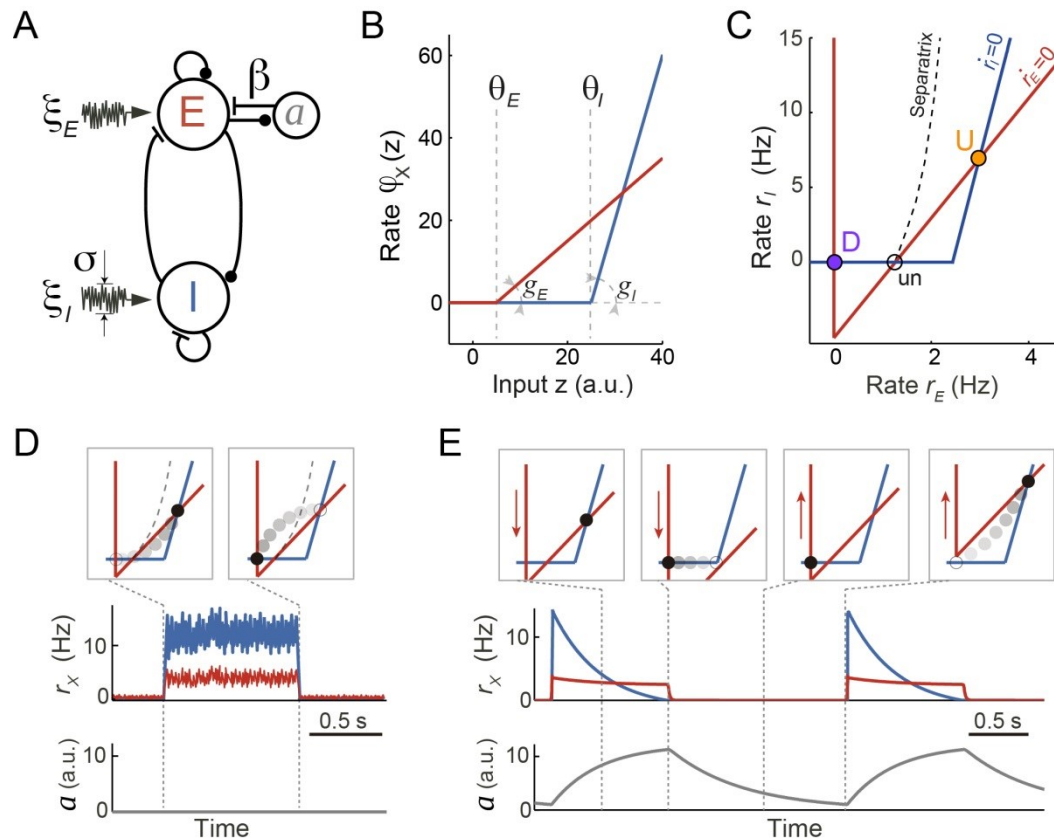

250  
 251  
 252 **Figure 4. Rate model for fluctuations and adaptation induced UP and DOWN dynamics.** (A) Network composed of recurrently  
 253 connected inhibitory (I, blue) and excitatory (E, red) populations, with E exhibiting rate adaptation  $a(t)$  and both populations  
 254 receiving independent fluctuating external inputs. (B) Transfer functions for the E and I populations are threshold-linear with  
 255 unequal thresholds  $\theta_E < \theta_I$  and unequal gains  $g_E < g_I$ . This marked asymmetry is at the origin of the bistability obtained in the  
 256 network. (C) In the absence of adaptation, the phase plane of rates  $r_E$  vs.  $r_I$  shows the E and I nullclines (red and blue,  
 257 respectively) whose intersections determine two stable (U and D) and one unstable (un) fixed points. The separatrix (dashed  
 258 line) divides the phase plane into the basins of attraction of the D and U stable points. (D, E) Schematics of fluctuations-  
 259 induced DU and UD transitions in the absence of adaptation ( $\beta=0$ ) and adaptation-induced transitions in the absence of  
 260 fluctuations ( $\sigma=0$ ), respectively. Traces of  $r_E(t)$ ,  $r_I(t)$  and adaptation  $a(t)$  illustrate steady fluctuating rates during U periods  
 261 when there is no adaptation (D), and a periodic alternation between U and D characterized by a strongly decaying I rate  
 262 during Us when there is no fluctuations (E). Top insets show the network trajectories in the phase-plane taken at different  
 263 time points (vertical dotted lines). Notice the downward (upward) displacement of the E-nullcline during U (D) periods (red  
 264 arrows in E). Connectivity parameters:  $J_{EE} = 5$ ,  $J_{EI} = 1$ ,  $J_{IE} = 10$ ,  $J_{II} = 0.5$  s; Transfer function parameters:  $g_E = 1$ ,  $g_I = 4$  Hz,  $\theta_E$   
 265  $= 0$ ,  $\theta_I = 25$  a.u..

266 and had a larger slope than the E nullcline, the system exhibited two stable attractors (Eq. 20 in  
267 Methods). This configuration of the nullclines was readily obtained by setting the threshold and the  
268 gain of the I transfer function larger than those of the E transfer function (Fig. 4B), a distinctive feature  
269 previously reported when intracellularly characterizing the  $f - I$  curve of pyramidal and fast spiking  
270 interneurons in the absence of background synaptic activity (Cruikshank et al., 2007; Schiff and  
271 Reyes, 2012). This novel bistable regime yielded a quiescent D state, and arbitrarily low firing rates for  
272 both E and I populations during U states, depending on the values of the thresholds and the synaptic  
273 weights (Fig. 4C). This is remarkable as in most bistable network models the rate of the sustained  
274 activity state is constrained to be above certain lower bound (see Discussion). Moreover, in this  
275 bistable regime, the U state is an inhibition-stabilized state, a network dynamical condition in which the  
276 excitatory feedback is so strong that would alone be unstable, but is balanced with fast and strong  
277 inhibitory feedback to maintain the rates stable (Ozeki et al., 2009; Tsodyks et al., 1997) (see  
278 Methods).

279 There are two ways in which transitions between U and D states can occur. On the one hand,  
280 transitions could be driven by external input fluctuations, which were modeled as a stochastic process  
281 with zero mean and short time constant (Fig. 4D). This fluctuating input reflected either afferents  
282 coming from other brain areas whose neuronal activity was stochastic and uncorrelated with the  
283 cortical circuit internal dynamics or the stochasticity of the spiking happening during U periods which  
284 was not captured by the dynamics of the rates (Holcman and Tsodyks, 2006; Lim and Rinzel, 2010).  
285 On the other hand, in the absence of fluctuations, state transitions could also occur solely driven by  
286 adaptation currents (Fig. 4E). Because the adaptation time constant was much longer than the time  
287 constants of the E and I rates, the dynamics of the rates  $r_E(t)$  and  $r_I(t)$  relaxing rapidly to their steady-  
288 state can be decoupled from the slow changes in  $a(t)$  (Latham et al., 2000; Rinzel and Lee, 1987).  
289 The network dynamics can be described in the phase plane  $(r_E(t), r_I(t))$  with variations in  $a(t)$  causing a  
290 displacement of the E-nullcline. In particular, during U periods the build-up in adaptation produced a  
291 downward displacement of the E-nullcline (Fig. 4E). If adaptation strength  $\beta$  was sufficiently large the  
292 displacement increased until the U state was no longer a fixed point and the network transitioned to  
293 the only stable fixed point D. Recovery of adaptation during D periods shifted the E-nullcline upwards  
294 until the D state disappeared and there was a transition to the U state (Fig 4E). In this limit cycle  
295 regime the network exhibited an oscillatory behavior with a frequency close to the inverse of the  
296 adaptation recovery time constant. When the two types of transitions are combined, two types of  
297 stability in U and D states can be distinguished: (1) metastable, referred to a state that was stable to  
298 the dynamics of both the rates and the adaptation but could transition away due to input fluctuations;  
299 (2) quasi-stable, referred to a state that was stable for the fast rate dynamics but unstable for the slow  
300 adaptation dynamics, plus it was also susceptible to fluctuation-driven transitions.

301

## 302 UP and DOWN state statistics in the model

303 To quantify the relative impact of activity fluctuations and adaptation in causing U-D transitions in the  
304 data, we compared the dynamics of the model for different adaptation strengths  $\beta$  and different values  
305 of the E effective threshold  $\theta_E$ . The  $(\theta_E, \beta)$  plane was divided into four regions with UD alternations,  
306 corresponding to the four combinations of metastability and quasi-stability (Fig. 5A). Since only  
307 metastable states tend to give exponentially distributed durations with  $CV \sim 1$ , the large variability found  
308 in both U and D durations (Fig. 2B) constrained the model to the subregion where both states were  
309 metastable and UD and DU transitions were driven by fluctuations (red area in Fig. 5A). The existence  
310 of serial correlations between consecutive U and D in the data (Fig. 2C-D) discarded an adaptation-  
311 free regime ( $\beta = 0$ ), in which transitions were solely driven by fluctuations and the duration of each  
312 period was independent of previous durations (Fig. 5B right). Thus, we explored a regime with  $\beta > 0$   
313 but still in the region where both states were metastable (Fig. 5B, green square) producing alternation  
314 dynamics (Fig. 5C top) with broad U and D duration distributions and relatively high CVs (Fig. 5D top).  
315 Moreover, the rates showed an autocorrelation function qualitatively similar to the data, with negative  
316 side-lobes but no clear traces of rhythmicity (Fig. 5E). Adaptation introduced correlations across  
317 consecutive periods (Fig. 5D bottom) because at the transition times the system kept a memory of the  
318 previous period in the adaptation value  $a(t)$ . For adaptation to introduce substantial correlations,  $a(t)$   
319 had to be variable at the transition times (Lim and Rinzel, 2010), a condition that required adaptation  
320 to be fast, to vary within one period, but not too fast to prevent reaching the equilibrium (Fig. 5C  
321 bottom trace). Thus, when a strong fluctuation caused a premature UD transition, i.e. a short  $U_k$ ,  
322 adaptation had no time to build up and tended to be small, increasing the probability of a premature  
323 DU transition in the following D period, i.e. a short  $D_{k+1}$ . Conversely, a long  $U_k$  recruited strong  
324 adaptation that required a long  $D_{k+1}$  to recover (see highlighted examples in Fig. 5C). In this regime,  
325 changes in  $a(t)$  alone did not cause transitions but did modulate the probability that an external  
326 fluctuation would cause a transition (Moreno-Bote et al., 2007). Altogether, this analysis suggests that  
327 the observed U-D dynamics occurred in a regime with strong random fluctuations, that these  
328 fluctuations were necessary to cause the transitions, and that adaptation modulated the timing of the  
329 transitions and consequently introduced correlations between the duration of consecutive periods.

330

## 331 Dynamics of E and I populations during UP and DOWN states: model and data

332 According to the model, adaptation currents in the E population can parsimoniously account for the U-  
333 D serial correlations but this is in apparent contradiction with the fact that the population rate  $R(t)$  in the  
334 data did not decrease significantly during U periods (Fig. 3C-E). To reconcile these two seemingly  
335 contradictory observations we used the model with the parameters that matched the data's U and D  
336 statistics (Fig. 5C-E) to characterize the time course of the rates  $r_E(t)$  and  $r_I(t)$  averaged across DU and

337

338  
339

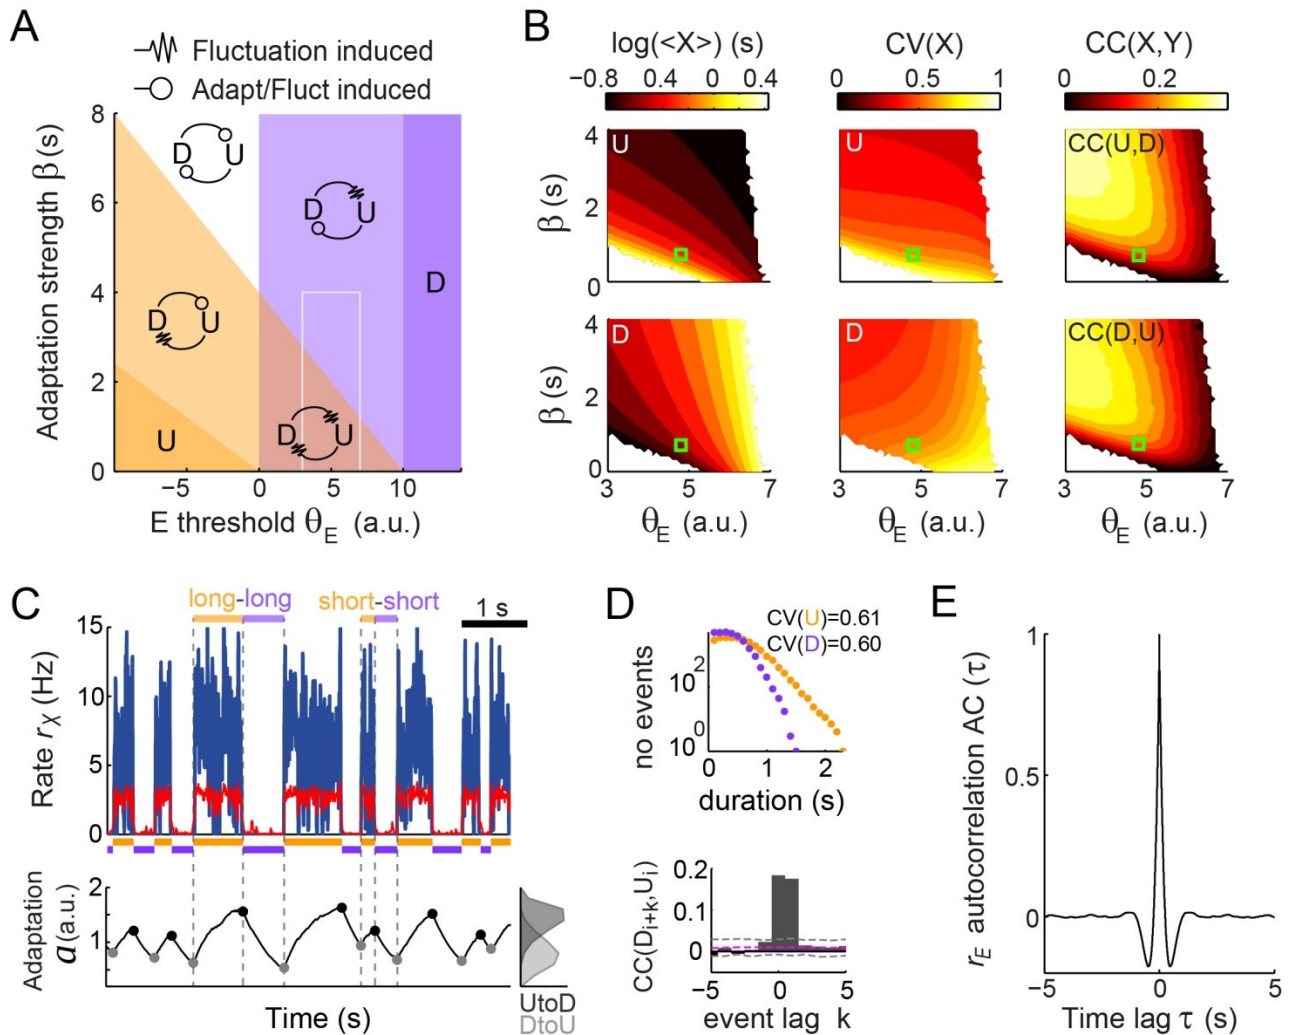

340  
341  
342 **Figure 5. Fluctuations and weak adaptation are required in the model to explain the U-D statistics of the data.** (A) Different  
343 dynamical regimes of the model as a function of the adaptation strength  $\beta$  and the effective threshold  $\theta_E$ . Each U and D state  
344 is either meta-stable or quasi-stable depending on whether the transitions to the opposite state can be caused by fluctuations  
345 or adaptation+fluctuations, respectively (see arrow code in top inset). There are five region types: regions with a single stable  
346 state and no transitions (dark violet and dark orange), a region with both U and D meta-stable (light red), one with both U and  
347 D quasi-stable (white) and mixed regions with a meta-stable and a quasi-stable state (light orange and light violet). (B)  
348 Statistics of U (top) and D (bottom) periods obtained from numerical simulations: mean durations (left), duration CV (center)  
349 and of cross-correlation CC of consecutive periods (right) as a function of  $\beta$  and  $\theta_E$ . The region analyzed is marked in A (gray  
350 rectangle). Fluctuations were  $\sigma = 3.5$ . White areas indicate very low transition rate. (C-E) Model example quantitatively  
351 reproducing some U-D statistics of the data. The  $\beta$  and  $\theta_E$  used are marked in B (green square;  $\theta_E = 4.8$  a.u.,  $\beta = 0.7$  Hz<sup>-1</sup>).  
352 Example traces of  $r_E(t)$ ,  $r_I(t)$ , and  $a(t)$  show U-D transitions with irregular durations (C). Black and gray filled dots indicate the  
353 adaptation values at the UD and DU transition times, respectively. The corresponding histograms illustrate the variability of  
354 these values (C bottom right). (D) Top: Distributions of U and D period durations. Bottom: Cross-correlograms of D and U  
355 periods for different lag values (compare with Fig. 2C). Grey dashed lines show global error bands and magenta dashed line  
356 shows mean CC of shuffles. (E) Autocorrelation of  $r_E(t)$  shows no traces of rhythmicity.

357 UD transitions. Interestingly, the average  $r_E(t)$  at the beginning and at the end of U periods did not  
358 show much difference whereas the average  $r_I(t)$  showed a larger decrease over the U period (Fig. 6A).  
359 Thus, although only the E and not the I population included intrinsic adaptation mechanisms, it was  
360  $r_I(t)$  the one that exhibited the most pronounced decay during U periods. This was a direct  
361 consequence of the specific conditions that gave rise to bistability in our model: the difference in  
362 thresholds, i.e.  $\theta_I > \theta_E$ , and the fact that the I-nullcline has a higher slope than the E-nullcline (Eq. 21  
363 in Methods). These features imposed that as adaptation built up during U periods, the downward  
364 displacement of the E-nullcline caused a greater decrease in  $r_I(t)$  than in  $r_E(t)$  (compare “decay” colored  
365 bands in Fig. 6B). With this arrangement the drop in  $r_E(t)$  could be made arbitrarily small by increasing  
366 the slope of the I-nullcline (Fig. 6B). During D periods the average  $r_E(t)$  did show a substantial increase  
367 due to the recovery of adaptation, whereas the  $r_I(t)$  did not. This was because in the D state, the  
368 quiescent network behaved as isolated neurons reflecting the dynamics of intrinsic adaptation which  
369 was only present on E cells. In sum, if the majority of the neurons that we recorded experimentally  
370 were excitatory, the model could explain why adaptation currents did not cause a significant decrease  
371 in the average rate during U periods (Fig. 3C-D). The model in addition predicts that the rate of  
372 inhibitory neurons should exhibit a noticeable decrease during U periods.

373 Motivated by this prediction, we investigated the dynamics of the rates of excitatory and  
374 inhibitory neurons during U and D periods in the experimental data. Based on spike waveforms,  
375 isolated units from  $n=5$  experiments were classified into putative interneurons (I) and putative  
376 excitatory neurons (E), following previously described procedures (Barthó et al., 2004). The average  
377 rate for E and I populations ( $R_E(t)$  and  $R_I(t)$ , respectively) displayed similar profiles across UD  
378 alternations, although higher values were observed for I cells during Us (see example experiment in  
379 Fig. 6C). To assess the modulation of the rates during U periods, we looked at the normalized  
380 individual rates of all the E and I neurons ( $n=330$  and  $21$ , respectively). As predicted by the model  
381 (Fig. 6B), I cells displayed a significant rate decay during U periods that was not observed in E cells  
382 (Fig. 6E; mixed-effects ANOVA with factors neuron type (E/I), onset/offset and neuron identity and  
383 experiment as random factors: interaction neuron type  $\times$  onset/offset  $F(1,349)=6.3$ ,  $p=0.013$ ). During D  
384 periods, E cells also showed a significant increase in rate (Wilcoxon signed rank test  $P=0.0092$ ), just  
385 like that observed in the whole cell population, whereas no rate change was found in I cells (not  
386 shown). Although these changes observed during D periods were also predicted by the model,  
387 properly testing the significance of this interaction would require a larger data set with more I cells. The  
388 validation of the prediction on the counter-intuitive emergent dynamics of E and I rates during U  
389 periods strongly suggests that the mechanism dissected by the model drives the spontaneous  
390 dynamics of the cortical circuitry under urethane anesthesia.

391

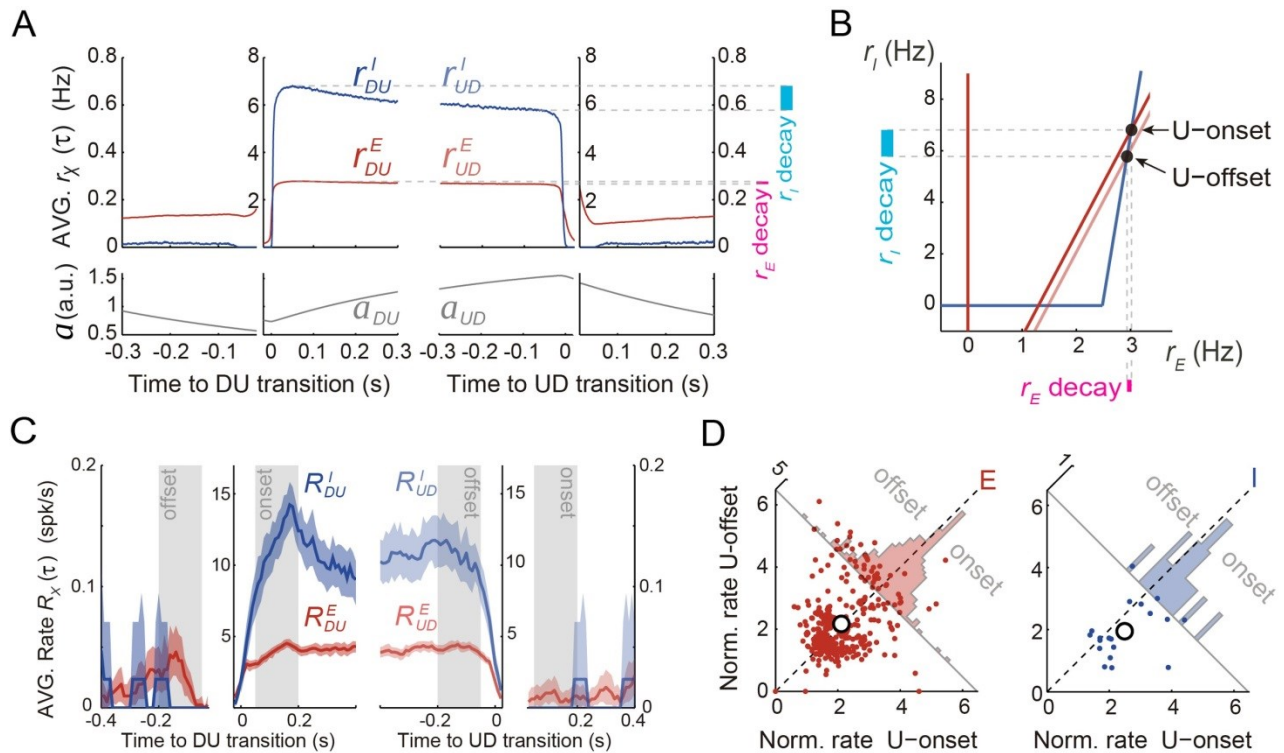

392  
 393  
 394 **Figure 6. Excitatory and inhibitory populations during UP and DOWN alternation dynamics. (A)** Model average population  
 395 rates  $r_E$  and  $r_I$  and adaptation  $a$  as a function of time, aligned at DU and UD transitions (same simulation parameters as in Fig  
 396 5C). **(B)** Model predicts a pronounced decay for  $r_I$  (cyan bar) with minimal decay of  $r_E$  (pink bar) throughout UP periods,  
 397 despite adaptation is exclusively included in E cells (Fig 4A). **(C)** Example experiment averaged putative excitatory and  
 398 inhibitory population rates ( $R^E(\tau)$  and  $R^I(\tau)$ , respectively) aligned at DU and UD transitions. **(D)** Normalized firing rates from  
 399 individual neurons (see methods) pooled from different experiments ( $n=5$ ; 330 putative E cells and 21 putative I cells active  
 400 during U) comparing the activity from putative E and I cells during U onset and offset periods (gray shaded areas from panel  
 401 C), reveals a significant decrease of I cells during U periods.

402

## 403 Discussion

404  
405 Using cortical population recordings we have shown that UP and DOWN period durations are  
406 irregular, show positive serial correlation, but there is no significant decrease of population rate during  
407 UP periods. These findings seem inconsistent with each other, as some support and others challenge  
408 the idea that UP-DOWN dynamics are caused by cell or synaptic adaptive mechanisms. Using a  
409 standard EI rate model network, we have proposed a novel bistable regime based only on the  
410 expansive threshold non-linearity of the transfer function and on a reported asymmetry between E and  
411 I spiking thresholds. While fluctuations produce transitions between the quiescent state (D) and the  
412 inhibition-stabilized state of arbitrarily low rate (U), adaptation acting on the E population only  
413 facilitates the effect of fluctuations causing the transitions. Paradoxically, because of the asymmetry  
414 between E and I thresholds, adaptation causes a marginal decay of E rates but a significant decay of I  
415 rates during UP periods. This counterintuitive prediction, specific of our model, was validated in the  
416 experimental data.

417 Adaptive processes constitute the mechanistic hallmark for cortical UP and DOWN dynamics  
418 generation (Contreras et al., 1996; Sanchez-Vives and McCormick, 2000; Timofeev et al., 2000). This  
419 principle has been used in several computational models, by implementing synaptic short-term  
420 depression (Bazhenov et al., 2002; Benita et al., 2012; Hill and Tononi, 2005; Holcman and Tsodyks,  
421 2006; Mejias et al., 2010), or activity-dependent adaptation currents (Compte et al., 2003b; Destexhe,  
422 2009; Latham et al., 2000; Mattia and Sanchez-Vives, 2012).

423 Consistent with an adaptive process generating the dynamics, UP and DOWN states observed *in vitro*  
424 display clear rhythmicity with Gaussian shaped UP and DOWN duration distributions (Mattia and  
425 Sanchez-Vives, 2012). An *in vivo* study using ketamine anesthesia in mice reported a reduced UP and  
426 DOWN duration variability across multiple cortical areas with CVs around 0.2-0.4 (Ruiz-Mejias et al.,  
427 2011). Moreover, a comparison of the UP and DOWN dynamics in the cat observed under ketamine  
428 anesthesia and those found in slow wave sleep (SWS) showed that the alternations were more  
429 rhythmic under ketamine (Chauvette et al., 2011). In contrast, our data displayed large variability  
430 (mean  $CV(U) \sim CV(D) \approx 0.7$ ) and skewed distributions of UP and DOWN period durations (Fig. 2B), in  
431 agreement with previous studies using urethane anesthesia (Dao Duc et al., 2015; Stern et al., 1997).  
432 Although a direct comparison between the UP-DOWN dynamics under urethane anesthesia and  
433 during natural sleep has not been made, urethane seems to mimic sleep in several aspects. First, it  
434 induces spontaneous alternations between synchronized and desynchronized states (Curto et al.,  
435 2009; Steriade et al., 1994), resembling the alternations between SWS and REM sleep (Clement et  
436 al., 2008; Whitten et al., 2009). Second, the irregular UP-DOWN transitions observed under urethane  
437 anesthesia resemble the variability observed in SWS (Ji and Wilson, 2007; Johnson et al., 2010).  
438 Preliminary analysis of rat and mouse prefrontal cortex during SWS with the same population-based  
439 U-D detection methods used here (Methods) showed that U periods had comparable mean length but



440 were more irregular ( $CV \sim 1$ ) than under urethane anesthesia (Fig. 1B) whereas D periods were shorter  
441 (mean  $\sim 150$  ms) and slightly more regular ( $CV \sim 0.5$ ) (unpublished observations). Such an asymmetry  
442 in the duration and irregularity of U-D periods can be easily reproduced in our model by choosing  
443 parameters in the mixed region where U is meta-stable and D is quasi-stable (Fig. 5A light orange).  
444 In addition, we found non-zero correlations between consecutive D-U and U-D period durations, a  
445 feature that was not observed previously in similar experimental conditions (Stern et al., 1997).  
446 Reduced statistical power ( $\sim 30$  U-D/D-U pairs were considered by (Stern et al., 1997) versus a range  
447 of 462-758 pairs in our  $n=7$  experiments) and different U-D detection methods (intracellular membrane  
448 potential thresholding) could be the reasons for this discrepancy.

#### 449 **Bistability in cortical networks at low firing rates**

450 Bistability in a dynamical system refers to the coexistence of two possible steady states between  
451 which the system can alternate (Angeli et al., 2004). This principle has been used to interpret UP and  
452 DOWN states as two attractors of cortical circuits (Cossart et al., 2003; Shu et al., 2003) and it seems  
453 to underlie higher cognitive functions (Compte, 2006; Durstewitz, 2009). In particular, multi-stability in  
454 recurrent cortical networks has been postulated to underlie the persistent activity observed during the  
455 delay period in working memory tasks. Extensive theoretical work has shown that based on the  
456 change in curvature of the neuronal  $f - I$  curve, i.e. from expansive to contractive, recurrent network  
457 models generate two types of co-existing attractors: a spontaneous state with arbitrarily low rates  
458 (falling in the expansive part of the  $f - I$  curve) and a sustained activity attractor where the reverberant  
459 activity of a subpopulation of neurons could be maintained at a rate on the contractive part of the  $f - I$   
460 curve (Amit and Brunel, 1997; Brunel, 2000a; Wang, 2001). Thus, unless additional mechanisms are  
461 included, e.g. synaptic short-term depression and facilitation (Barbieri and Brunel, 2007; Hansel and  
462 Mato, 2013; Mongillo et al., 2012) or finely-tuned EI balance (Renart et al., 2007), the rate of persistent  
463 states is lower-bounded by the rate where the  $f - I$  curve changes from convex to concave ( $\sim 10$ - $20$   
464 spikes/s). Moreover, because of this the sustained attractor operates in an unbalanced supra-  
465 threshold regime where spike trains tend to be more regular (i.e. lower inter-spike-interval CV,  
466 (Barbieri and Brunel, 2007; Hansel and Mato, 2013; Renart et al., 2007)) than those observed in the  
467 data (Compte et al., 2003b).

468 UP and DOWN states represent in contrast transitions between very different levels of activity:  
469 a quiescent state and a very low rate state. Given that we recorded neurons extracellularly, our  
470 estimate of the mean firing rate during UP periods (3.7 spikes/s) is most likely an overestimation.  
471 Whole cell intracellular recordings have reported rates in the range 1-2 spikes/s (Constantinople and  
472 Bruno, 2011), 0.4 spikes/s in Pyramidal L2/3 of the somatosensory cortex of awake mice (Gentet et  
473 al., 2012), 0.1 spikes/s Pyramidal L2/3 cells in somatosensory cortex during UP periods in  
474 anesthetized rats (Waters and Helmchen, 2006), or 0.1-0.3 spikes/s in V1 of awake mice (Haider et  
475 al., 2013). Juxtacellular recordings have found values near 4-5 spikes/s (Massi et al., 2012; Sakata

476 and Harris, 2009) whereas Calcium imaging experiments report spontaneous rates  $<0.1$  spikes/s (Kerr  
477 et al 2005). Despite UP rates being so low, rate models have commonly used the change in curvature  
478 of the transfer function to generate UP and DOWN dynamics (Curto et al., 2009; Lim and Rinzel, 2010;  
479 Mattia and Sanchez-Vives, 2012; Mochol et al., 2015). It is also for this reason that most spiking  
480 network models generating UP and DOWN transitions exhibit unrealistically high rates during U  
481 periods (in the range 10-40 spikes/s) with relatively regular firing (Bazhenov et al., 2002; Compte et  
482 al., 2003b; Destexhe, 2009; Hill and Tononi, 2005).

483 An alternative mechanism to generate bistability between UP and DOWN states has been the  
484 shunting or divisive effect of inhibitory synaptic conductances, a mechanism that can produce non-  
485 monotonic transfer functions and yield bistability between a zero rate state and a state of very low rate  
486 (Kumar et al., 2008; Latham et al., 2000; Vogels and Abbott, 2005). Latham and colleagues (Latham  
487 et al., 2000) addressed the question of how to obtain a state of low firing rates (i.e.  $<1$  spikes/s) in a  
488 recurrent EI network and concluded that there were two alternative mechanisms: the most robust was  
489 to have a single attractor that relied on the excitatory drive from endogenously active neurons in the  
490 network or from external inputs. In fact, excitatory external inputs have been widely used to model low  
491 rate tonic spontaneous activity (i.e. no DOWN states) in EI networks of current-based spiking units  
492 (Amit and Brunel, 1997; Brunel, 2000b; Vogels and Abbott, 2005). Alternatively, in the absence of  
493 endogenous or external drive, a silent attractor appears and a second attractor can emerge at a low  
494 rate over a limited range of parameters if inhibition exerts a strong divisive influence on the excitatory  
495 transfer function (Latham et al., 2000). Based on this, a spiking network of conductance-based point  
496 neurons with no external/endogeneous activity could alternate between UP (0.2 spikes/s) and DOWN  
497 (0 spikes/s) periods via spike frequency adaptation currents.

498 Our model proposes a more parsimonious mechanism underlying UP-DOWN bistability: the  
499 ubiquitous expansive threshold non-linearity of the transfer function plus the asymmetry in threshold  
500 ( $\theta_I > \theta_E$ ) and gain (larger for I than E cells). We used a threshold-linear function for simplicity but other  
501 more realistic choices (e.g. threshold-quadratic) produced the same qualitative results. The threshold  
502 asymmetry is supported by *in vitro* patch clamp experiments revealing that firing threshold of inhibitory  
503 fast-spiking neurons, measured as the lowest injected current causing spike firing, is higher than that  
504 of excitatory regular-spiking neurons (Cruikshank et al., 2007; Schiff and Reyes, 2012). Thus,  
505 inhibition in this model becomes active when external inputs onto E cells during the DOWN state are  
506 strong enough to push the system above the separatrix and ignite the UP state. Once recruited,  
507 inhibition is necessary to stabilize the activity because, in its absence, the positive feedback would  
508 make the UP state unstable. These are the conditions that define an Inhibitory Stabilized Network  
509 (Ozeki et al., 2009), which in large networks is referred to as the balance state (Amit and Brunel, 1997;  
510 Renart et al., 2010; van Vreeswijk and Sompolinsky, 1998). Thus, according to our model, cortical  
511 circuits alternate between a quiescent state with no activity and a state of balanced irregular and  
512 asynchronous low rate activity (Renart et al., 2010). It is for this reason that in the rodent, mean pair-

513 wise spiking correlations during UP periods are negligible (Renart et al., 2010; Stern et al., 1998) and  
514 that the rate of coordinated transitions to the DOWN state predicts the magnitude of correlations  
515 across different brain states (Mochol et al., 2015).

516 A direct implication of the bistability obtained in our model was that intrinsic adaptation of excitatory  
517 neurons (McCormick et al., 1985) did not cause a noticeable decrease in  $r_E$  during the UP periods but  
518 instead produced a significant decay in the inhibitory rate  $r_I$ . We confirmed this prediction in our data  
519 (Fig. 6C-D). Interestingly, the same effect was also observed in ketamine anesthetized animals from  
520 both extracellular (Luczak and Barthó, 2012) and intracellular recordings resolving synaptic  
521 conductances (Haider et al., 2006). During DOWN periods in contrast, the network is not in a balanced  
522 state and recovery from adaptation caused a significant increase in the rate of putative excitatory  
523 neurons, as predicted by the model. In sum, our results present the first EI network model with linearly  
524 summed inputs exhibiting bistability between a quiescent state and a balanced state with arbitrary low  
525 rate.

526

## 527 **The role and origin of fluctuations in UP-DOWN switching**

528 Our findings stress the role of input fluctuations inducing transitions between the UP and DOWN  
529 network attractors because noise-induced alternations generate periods with large variability as found  
530 in the data (Fig. 2A-B). Adaptation was also necessary to introduce positive serial correlations and to  
531 reproduce the observed gamma-like UP-DOWN distributions (compare Fig. 2A-B and Supp. Fig 1 with  
532 Fig. 5D) because it caused a soft refractory period after each transition decreasing the duration CVs  
533 below one (Fig. 2B). In our network model fluctuations were simply introduced by a time-varying  
534 Gaussian input so that in both DU and UD transitions the noise had the same external origin. In  
535 cortical circuits however these two transitions are very different: while in UP-DOWN transitions the  
536 fluctuations can originate in the stochasticity of the spiking activity during the UP period, DU transitions  
537 depend on either local circuit mechanisms that do not need spiking activity or on external inputs to  
538 escape from a quiescent state. Previous bistable spiking network models have used the stochasticity  
539 of the recurrent spiking activity to cause transitions from a balanced regime into a quiescent state (i.e.  
540 UP-to-DOWN) (Kumar et al., 2008; Latham et al., 2000). Other models have proposed that synaptic  
541 noise (e.g. spontaneous miniatures) could cause the transitions from the quiescent state (i.e. DOWN  
542 to UP) (Bazhenov et al., 2002; Holcman and Tsodyks, 2006; Mejias et al., 2010). Preliminary analysis  
543 using a spiking EI network to produce UP-DOWN alternations shows that to cause noise-driven  
544 transitions from a quiescent state synaptic inputs into each neuron need to be correlated and non-  
545 Gaussian (not shown). Gaussian uncorrelated inputs must generate an unrealistically high DOWN  
546 firing rate in order to yield a measurable escape probability to the UP state (because escape requires  
547 the synchronous occurrence of multiple independent neuronal discharges). That is why synaptic noise,  
548 which is in principle independent across synapses, could not account for DOWN-to-UP transitions

549 having variable DOWN duration and near zero firing, e.g.  $CV(D) \sim 0.7$  (Fig. 2B) and  $r_D \sim 0.018$  spikes/s  
550 (Supp. Fig. 2B). This reasoning favors instead synchronous external input *kicks* as the inducers of  
551 DOWN-to-UP transitions. Evidence for such temporally sparse synchronous inputs comes from  
552 intracellular membrane potential recordings under some types of anesthesia (pentobarbital or  
553 halothane) showing «presynaptic inputs [...] organized into quiescent periods punctuated by brief  
554 highly synchronous volleys, or “bumps”» (DeWeese and Zador, 2006). We postulate that these  
555 spontaneous bumps (DeWeese and Zador, 2006; Tan et al., 2013; Taub et al., 2013) (1) are caused  
556 by synchronous external inputs impinging on the neocortex, possibly from thalamocortical neurons  
557 (Crunelli and Hughes, 2010), since spontaneous bumps resemble sensory evoked responses  
558 (DeWeese and Zador, 2006) or from hippocampal Sharp Wave Ripples (Battaglia et al., 2004); (2)  
559 their timing resembles a Poisson stochastic process rather than a rhythmic input (Tan et al., 2013); (3)  
560 they lie at the origin of the DOWN-to-UP transitions that we observe. Despite the fact that UP-DOWN-  
561 like activity can emerge in cortical slices *in vitro* (Cossart et al., 2003; Faselow and Connors, 2010;  
562 Mann et al., 2009; Sanchez-Vives and McCormick, 2000) the intact brain can generate more complex  
563 UP-DOWN patterns than the isolated cortex, with subcortical activity in many areas correlating with  
564 transition times (Battaglia et al., 2004; Crunelli et al., 2015; Crunelli and Hughes, 2010; David et al.,  
565 2013; Lewis et al., 2015; Slézia et al., 2011; Ushimaru et al., 2012). Further analysis using detailed  
566 spiking models will be necessary to characterize the detailed conditions under which external inputs  
567 can trigger an UP state, such as the number of cortical spikes that must be evoked and their degree of  
568 synchrony, the role of inhomogeneities in the connectivity generating trigger “hot spots” (Tsodyks et  
569 al., 2000) and stereotyped onset patterns (Luczak et al., 2009; Roxin et al., 2008).

570 These arguments bring forward the idea that DOWN to UP transitions are, at least in part,  
571 caused by punctuated external synchronous inputs (Battaglia et al., 2004; Johnson et al., 2010), with  
572 slow intrinsic adaptation mechanisms contributing to modulate the probability that these events trigger  
573 a transition (Moreno-Bote et al., 2007). This complements the idea that UP-DOWN dynamics reflect an  
574 endogenous oscillation of the neocortex and connects to the role of UP-DOWN states in memory  
575 consolidation: because in the active attractor (UP) the *stationary* activity is irregular and asynchronous  
576 (Renart et al 2010), the existence of a silent attractor enables synchronous transient dynamics in the  
577 form of DOWN to UP transitions. These transients generate precise temporal relations among neurons  
578 in a cortical circuit (Luczak et al 2007), which can cause synaptic plasticity underlying learning and  
579 memory (Peyrache et al 2009). We speculate that, while the transient dynamics are triggered by  
580 external inputs, adaptation, by introducing refractoriness in this process, parses transition events  
581 preventing the temporal overlap of information packets (Luczak et al., 2015).

582

## 583 Supplementary figures

584  
585  
586  
587  
588

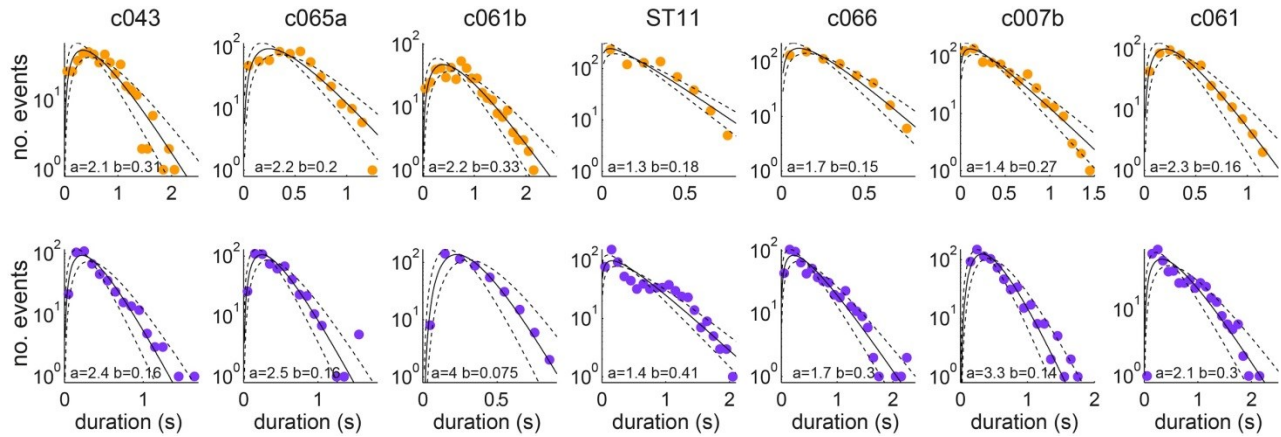

589  
590  
591 **Supplementary Figure 1.** Distributions of U (top row) and D (bottom row) period durations for the seven experiments  
592 (columns). Gamma fit for each distribution is shown in black. The shape  $a$  and scale  $b$  parameters of the Gamma fit are  
593 displayed at the bottom of each panel. 95% CI of the fit displayed in dashed line.

594  
595  
596  
597  
598  
599  
600

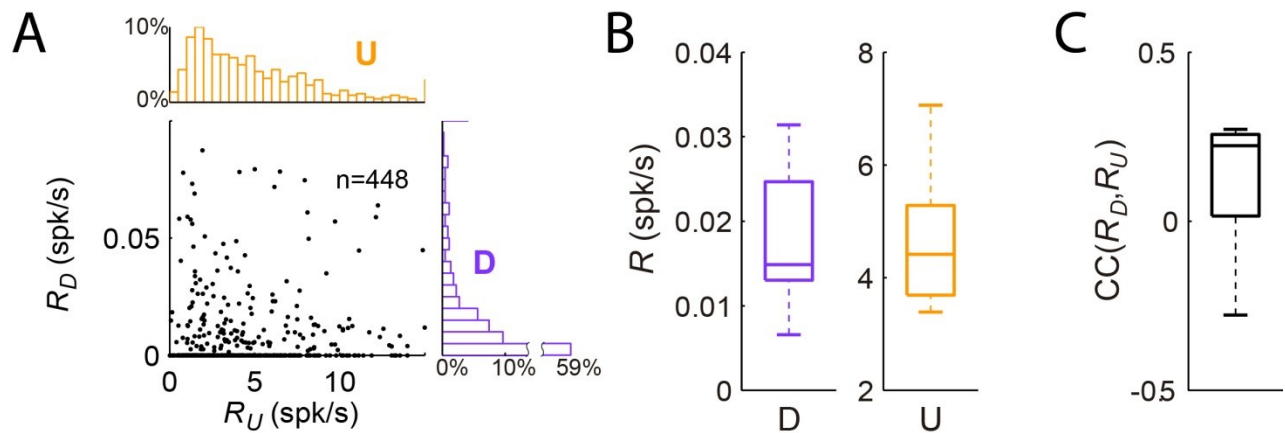

601  
602  
603 **Supplementary Figure 2.** Spiking statistics of individual units during U and D periods. (A) Scatter plot of average firing rate  
604 during U periods versus firing rate during D periods ( $R_U$  vs  $R_D$ ), from all the isolated cells from the different experiments ( $n=7$   
605 animals; 448 cells). Marginal distribution of firing rates for  $R_U$  in orange and  $R_D$  in violet. (B) Statistics of mean single cell  
606 firing rates during D (left boxplot) and U (right boxplot) periods for different experiments. (C) Statistics of mean correlation  
607 between firing rate during D and U periods for different experiments.

608  
609

## 610 **Materials and methods**

### 611 **Experimental procedures.**

612 Adult, male Sprague-Dawley rats (250-400g) were anesthetized with urethane (1.5 g/kg) and  
613 supplemental doses of 0.15 g/kg were given when necessary after several hours since the initial dose.  
614 We also used an initial dose of Ketamine (15-25 mg/kg) before the surgery to induce the anesthetized  
615 state quickly. We then performed a craniotomy over the somatosensory cortex, whose position was  
616 determined using stereotaxic coordinates. Next 32 or 64 channels silicon microelectrodes  
617 (Neuronexus technologies, Ann Arbor MI) were slowly inserted into in deep layers of the cortex (depth  
618 600-1200  $\mu\text{m}$ ; lowering speed  $\sim$  1mm/hour). Probes had either eight shanks each with eight staggered  
619 recording sites per shank (model Buzsaki64-A64), or four shanks with two tetrode configurations in  
620 each (model A4x2-tet-5mm-150-200-312-A32). Neuronal signals were high-pass filtered (1Hz) and  
621 amplified (1,000X) using a 64-channel amplifier (Sensorium Inc., Charlotte, VT), recorded at 20kHz  
622 sampling rate with 16-bit resolution using a PC-based data acquisition system (United Electronic  
623 Industries, Canton, MA) and custom written software (Matlab Data Acquisition Toolbox, MathWorks)  
624 and stored on disk for further analysis.

625

### 626 **Data Analysis.**

627 Spike sorting was performed using previously described methods (Harris et al., 2000). Briefly, units  
628 were isolated by a semiautomatic algorithm (<http://klustakwik.sourceforge.net>) followed by manual  
629 clustering procedures (<http://klusters.sourceforge.net>). We defined the *Population activity* as the  
630 merge of the spike trains from all the well isolated units.

631

632 ***Putative E/I neuronal classification.*** Isolated units were classified into narrow-spiking (I) and broad-  
633 spiking (E) cells based on three features extracted from their mean spike waveforms: spike width,  
634 asymmetry and through-to-peak distance. The two classes were grouped in the space of features by  
635 k-means clustering (Barthó et al., 2004; Csicsvari et al., 1998; Sirota et al., 2008).

636

637 ***Synchronized state assessment.*** We classified the brain state based on the silence density defined  
638 as the fraction of 20 ms bins with zero spikes in the Population activity in 10 s windows (Mochol et al.,  
639 2015; Renart et al., 2010). Epochs with consecutive windows of silence density above 0.4, standard  
640 deviation below 0.1 and longer than 5 min, were considered as sustained synchronized brain state and  
641 were used for further analysis (synchronized states durations mean $\pm$ SD: 494 $\pm$ 58 s, n=7 epochs).

642

643 ***UP & DOWN transitions detection.*** UP-DOWN phases have been commonly defined from  
644 intracellular recordings by detecting the crossing times of a heuristic threshold set on the membrane

645 potential of individual neurons (Mukovski et al., 2007; Stern et al., 1997), or from local field potential  
646 signals (Compte et al., 2008; Mukovski et al., 2007) or combined together with the information  
647 provided by multi-unit activity (Haider et al., 2006; Hasenstaub et al., 2007). Defining UP-DOWN  
648 phases from single-unit recordings is more challenging because individual neurons fire at low rates  
649 discharging very few action potentials on each UP phase (Constantinople and Bruno, 2011; Gentet et  
650 al., 2012; Waters and Helmchen, 2006). However, pooling the spiking activity of many neurons into a  
651 population spike train reveals the presence of co-fluctuations in the firing activity of the individual  
652 neurons and allows accurate detection of UP-DOWN phases (Luczak et al., 2007; Saleem et al.,  
653 2010). We used a discrete-time hidden semi-Markov probabilistic model (HMM) to infer the discrete  
654 two-state process that most likely generated the population activity (Chen et al., 2009). Thus, the  
655 population activity spike count was considered as a single stochastic point processes whose rate was  
656 modulated by the discrete hidden state and the firing history of the ensemble of neurons recorded. In  
657 order to estimate the hidden state at each time, the method used the expectation maximization (EM)  
658 algorithm for the estimation of the parameters from the statistical model (Chen et al., 2009). Although  
659 the discrete-time HMM provides a reasonable state estimate with a rather fast computing speed, the  
660 method is restricted to locate the UP and DOWN transition with a time resolution given by the bin size  
661 ( $T$ ) for the population activity spike count (10 ms in our case). The initial parameters used for the  
662 detection were: Bin-size  $T = 10$  ms, number of history bins  $J=2$  (sets the length of the memory, i.e.  $J=0$   
663 is a pure Markov process); history-dependence weight  $\beta = 0.01$  (i.e.  $\beta=0$  for a pure Markov process);  
664 transition matrix  $P_{DU}=P_{UD}=0.9$ ,  $P_{DD}=P_{UU}=0.1$ ; rate during UP periods  $\alpha = 3$ , and rate difference during  
665 DOWN and UP periods  $\mu = -2$  (Chen et al., 2009). The algorithm gives an estimate of the state of the  
666 network on each bin  $T$ . Adjacent bins in the same state are then merged to obtain the series of  
667 *putative UP (U) and DOWN (D) periods*. The series is defined by the onset  $\{t_i^{on}\}_{i=1}^M$  and offset  
668  $\{t_i^{off}\}_{i=1}^M$  times of the Us, where  $M$  is the total number of Us, that determine the  $i$ -th UP and DOWN  
669 period durations as (see Fig. 1C):

$$670 \quad U_i = t_i^{off} - t_i^{on} \quad (1)$$

$$671 \quad D_i = t_i^{on} - t_{i-1}^{off}$$

672  
673 **Statistics of UP & DOWN durations.** The mean and the coefficient of variation of  $U_i$  were defined as

$$674 \quad \langle U_i \rangle = \frac{1}{M} \sum_{i=1}^M U_i, \quad CV(U_i) = \frac{\sqrt{Var(U_i)}}{\langle U_i \rangle} \quad (2)$$

675 where:

$$676 \quad Var(U_i) = \left( \frac{1}{M} \sum_{i=1}^M U_i^2 \right) - \langle U_i \rangle^2 \quad (3)$$

677 and equivalently for  $\langle D_i \rangle$  and  $CV(D_i)$ . We controlled whether variability in  $U_i$  was produced by slow  
678 drifts by computing  $CV_2$  a measure of variability not contaminated by non-stationarities of the data  
679 (Compte et al., 2003a; Holt et al., 1996).

680 The serial correlation between  $U_i$  and  $D_{i+k}$ , with  $k$  setting the lag in the U-D series, e.g.  $k=0$  ( $k=1$ )  
 681 refers to the immediately previous (consecutive) DOWN period, was quantified with the Pearson  
 682 correlation coefficient defined as:

$$683 \quad \text{Corr}(U_i, D_{i+k}) = \frac{\text{Cov}(U_i, D_{i+k})}{\sqrt{\text{Var}(U_i) \text{Var}(D_i)}} \quad (4)$$

684 where the covariance was defined as:

$$685 \quad \text{Cov}(U_i, D_{i+k}) = \frac{1}{M-|k|} \sum_{i=1}^{M-k} (U_i - \langle U_i \rangle)(D_{i+k} - \langle D_i \rangle) \quad (5)$$

686  
 687 Values of  $U_i$  and  $D_i$  differing more than 3 standard deviations from the mean were discarded from the  
 688 correlation analysis (circles in Fig 2C). To remove correlations between  $U_i$  and  $D_i$  produced by slow  
 689 drifts in the durations we used resampling methods developed to remove slow correlations among  
 690 spike trains (Amarasingham et al., 2012). We generated the  $l$ -th shuffled series of U periods  $\{\widehat{u}_i^l\}_{i=1}^M$   
 691 by randomly shuffling the order of the Us in the original series  $\{U_i\}_{i=1}^M$  within intervals of 30 s. The  
 692 same was done to define the shuffled series of D periods  $\{\widehat{d}_i^l\}_{i=1}^M$ . The two shuffled series lack any  
 693 correlation except that introduced by co-variations in the statistics with a time-scale slower than 30 s.  
 694 We generated  $L=1000$  independent shuffled series  $\{\widehat{u}_i^l\}_{i=1}^M$  and  $\{\widehat{d}_i^l\}_{i=1}^M$  with  $l=1,2,\dots,L$ , computed the  
 695 covariance  $\text{Cov}(u_i^l, d_{i+k}^l)$  for each and the averaged over the ensemble  
 696  $\text{Cov}(u_i, d_{i+k}) = \langle \text{Cov}(u_i^l, d_{i+k}^l) \rangle_l$ . Finally, the correlation due to co-fluctuations of Us and Ds faster  
 697 than 30 s was computed by subtracting  $\text{Cov}(u_i, d_{i+k})$  from  $\text{Cov}(U_i, D_{i+k})$  in Eq. 5. Significance of the  
 698 correlation function  $\text{Corr}(U_i, D_{i+k})$  was assessed by computing a point-wise confidence interval from a  
 699 distribution of  $L$  correlograms  $\text{Corr}(u_i^l, d_{i+k}^l)$ , for  $l=1\dots L$  ( $L=10000$ ), computed from each shuffled  
 700 series the same way as for the original series (gray dashed bands in Fig 2C). To take into account  
 701 multiple comparisons introduced by the range in lag  $k$ , we obtained *global* confidence intervals (black  
 702 dashed bands in Fig 2C) by finding the  $P$  of the pointwise intervals for which only a fraction 0.05 of the  
 703 correlograms  $\text{Corr}(u_i^l, d_{i+k}^l)$  crosses the interval bands at *any* lag  $k = -7\dots 7$  (see (Fujisawa et al., 2008)  
 704 for details).

705  
 706 **Spike count statistics.** We divided the time in bins of  $dt=1$  ms and defined the spike train of the  $j$ -th  
 707 neuron as:

$$708 \quad s_j(t) = \begin{cases} 1 & \text{if there is a spike in } (t, t + dt) \\ 0 & \text{otherwise} \end{cases} \quad (6)$$

709  
 710 The *spike count* of the  $j$ -th neuron over the time window  $(t-T/2, t+T/2)$  was obtained from

$$711 \quad n_j(t; T) = (K * s_j)(t) \quad (7)$$

712 where  $*$  refers to a discrete convolution and  $K(t)$  is a square kernel which equals one in  $(-T/2, T/2)$  and  
 713 zero otherwise.

714



715 The instantaneous rate of the  $j$ -th neuron was defined as:

$$716 \quad r_i(t) = \frac{n_i(t;T)}{T} \quad (8)$$

717 and therefore the instantaneous population rate was defined as:

$$718 \quad R(t) = \frac{\sum_{j=1}^N n_j(t;T)}{T N} \quad (9)$$

719 where  $N$  is the total number of well isolated and simultaneously recorded neurons. We have dropped  
 720 the dependence on  $T$  from  $r_i(t)$  and  $R(t)$  to ease the notation. We also defined the instantaneous E-  
 721 population and I-populations rates,  $R^E(t)$  and  $R^I(t)$  respectively, as those computed using cells in the  
 722 E and I subpopulations separately.

723  
 724 **Population firing statistics during Us and Ds.** The instantaneous population rate averaged across  
 725 Us and Ds and aligned at the D to U transition (DU) was defined as:

$$726 \quad R_{DU}(\tau) = \frac{1}{m(t)} \sum_{i \in \{\tau < U_i\}} R(t_i^{on} + \tau) \quad , \text{ for } \tau > 0 \quad (10)$$

727 where  $\tau$  is the time to the DU transition. Because Us had different durations, for each  $\tau > 0$ , the sum  
 728 only included the onset time  $t_i^{on}$  if the subsequent period was longer than  $\tau < U_i$ . By doing this we  
 729 remove the trivial decay we would observe in  $R_{DU}(\tau)$  as  $\tau$  increases due to the increasing probability to  
 730 transition into a consecutive period  $D_{i+1}$ . For  $\tau < 0$ ,  $R_{DU}(\tau)$  reflecting the population averaged rate  
 731 during the Ds, is obtained as in Eq. 10 but including the times  $t_i^{on}$  in the sum if the previous D was  
 732 longer than  $|\tau| < D_{i-1}$ . Similarly, the average population rate aligned at the offset  $R_{UD}(\tau)$  was defined  
 733 equivalently by replacing  $\{t_i^{on}\}_{i=1}^M$  by the series of offset times  $\{t_i^{off}\}_{i=1}^M$ . We also defined the onset  
 734 and offset-aligned averaged population rate for excitatory (E) and inhibitory (I) populations, termed  
 735  $R_{DU}^E(\tau)$  and  $R_{UD}^E(\tau)$  for the E case and similarly for the I case. Moreover, the onset and offset-  
 736 aligned averaged rate of the  $i$ -th neuron  $r_{DU}^i(\tau)$  and  $r_{UD}^i(\tau)$  were defined similarly using the individual  
 737 rate defined in Eq. 8.

738

739 The autocorrelogram of the instantaneous population rate was defined as:

$$740 \quad AC(\tau) = \frac{\sum_{t=1}^{L-\tau} R(t)R(t+\tau) - \langle R(t) \rangle_t^2}{(L-|\tau|) \text{Var}(R(t))} \quad , \text{ for } \tau > 0 \quad (11)$$

741 with the sum in  $t$  running over the  $L$  time bins in a window of size  $W$ . The average  $\langle R(t) \rangle_t$  and  
 742 variance were performed across time in the same window. To avoid averaging out a rhythmic structure  
 743 in the instantaneous population rate due to slow drift in the oscillation frequency, we computed  $AC(\tau)$   
 744 in small windows  $W=20$  s thus having a more instantaneous estimate of the temporal structure. With  
 745 the normalization used, the autocorrelograms give  $AC(\tau = 0) = 1$  and the values with  $\tau > 0$  can be  
 746 interpreted as the Pearson correlation between the population rate at time  $t$  and the population rate at  
 747 time  $t + \tau$  (Fig. 1D).

748

749 **Instantaneous rates at onset and offset intervals.** To compare the population rates at the U-onset  
750 and U-offset (Fig 3 and 6), we computed for each neuron the mean of  $r_{DU}^i(\tau)$  over the window  
751  $\tau = (50,200) s$  (U-onset) and the mean of  $r_{UD}^i(\tau)$  over the window  $\tau = (-200, -50) s$  (U-offset). We  
752 positioned the windows 50 ms away of the DU and UD transitions in order to preclude the possibility of  
753 contamination in the mean rate estimations due to possible misalignments from the U and D period  
754 detections. In the averaging we used U and D periods longer than 0.5 s, so that onset and offset  
755 windows were always non-overlapping. Equivalent D-onset and D-offset windows were defined in  
756 order to compare individual rates during D periods. To make the distribution of mean rates across the  
757 cell population Gaussian, we normalized each the rates  $r_{DU}^i(\tau)$  and  $r_{UD}^i(\tau)$  by the overall time-  
758 averaged rate of the neuron  $r_i = \langle r_i(t) \rangle_t$  finally obtaining onset and offset-aligned *normalized*  
759 averaged rates (e.g.  $r_{DU}^i(\tau)/r_i$ ). Despite this normalization, the distribution of the normalized rates in  
760 the D-onset and D-offset was non-Gaussian (most neurons fired no spikes). Thus we used the non-  
761 parametric two-sided Wilcoxon signed rank test to compare onset and offset rates (Fig. 3E). To test  
762 the rates changes during U periods in E and I neurons we used a four-way mixed-effects ANOVA with  
763 fixed factors onset/offset, E/I and random factors neuron index and animal. We compared the  
764 distribution of *normalized* averaged rate difference at the U-onset minus the U -offset (Fig. 3E right,  
765 dark gray histogram) with a distribution obtained from the same neurons but randomly shuffling the  
766 onset and offset labels of the spike counts but preserving trial and neuron indices (Fig. 3E right, light  
767 gray bands show 95% C.I. of the mean histograms across 1000 shuffles). This surrogate data set  
768 represents the hypothesis in which none of the neurons shows any onset vs offset modulation. The  
769 comparison shows that there are significant fractions of neurons showing a rate decrease and  
770 increase that compensate to yield no significant difference on the population averaged rate. The same  
771 procedure was followed with the normalized rates in the D-onset and D-offset but the limited number  
772 of non-zero spike counts limited the analysis yielding inconclusive results (Fig. 3E left).

### 773 **Computational Rate Model.**

774 We built a model describing the rate dynamics of an excitatory ( $r_E$ ) and inhibitory population ( $r_I$ )  
775 recurrently connected that received external inputs (Wilson and Cowan, 1972). In addition, the  
776 excitatory population had an additive negative feedback term,  $a(t)$ , representing the firing adaptation  
777 experienced by excitatory cells (McCormick et al., 1985). The model dynamics were given by:

$$778 \quad \tau_E \frac{dr_E}{dt} = -r_E(t) + \varphi_E (J_{EE} r_E(t) - J_{EI} r_I(t) - a(t) + \sigma \xi_E(t)) \quad (12)$$

$$779 \quad \tau_I \frac{dr_I}{dt} = -r_I(t) + \varphi_I (J_{IE} r_E(t) - J_{II} r_I(t) + \sigma \xi_I(t)) \quad (13)$$

$$780 \quad \tau_a \frac{da}{dt} = -a(t) + \beta r_E(t) \quad (14)$$

781  
782 The time constants of the rates were  $\tau_E = 10$  ms and  $\tau_I = 2$  ms, while the adaptation time constant was  
783  $\tau_a = 500$  ms. The synaptic couplings  $J_{XY} > 0$  (with  $X, Y = E, I$ ), describing the strength of the connections

784 from  $Y$  to  $X$ , were  $J_{EE} = 5$ ,  $J_{EI} = 1$ ,  $J_{IE} = 10$ ,  $J_{II} = 0.5$  s. Because we are modeling low rates, the adaptation  
785 grows linearly with  $r_E$  with strength  $\beta = 0.5$  s. The fluctuating part of the external inputs  $\sigma \xi_X(t)$  was  
786 modeled as two independent Ornstein–Uhlenbeck processes with zero mean, standard deviation  $\sigma =$   
787 3.5 and time constant 1 ms for both E and I populations. Because population averaged firing rates  
788 during spontaneous activity fell in the range 0-10 spikes/s, we modeled the transfer functions  $\phi_X$  as  
789 threshold-linear functions:

$$790 \quad \phi_X(x) = g_X [x - \theta_X]_+, \quad X = \{E, I\} \quad (15)$$

791 where the square brackets denote  $[z]_+ = z$  if  $z > 0$  and zero otherwise, the gains were  $g_E = 1$  Hz and  
792  $g_I = 4$  Hz and the *effective* thresholds  $\theta_E$  and  $\theta_I$  represented the difference between the activation  
793 threshold minus the mean external current into each population. We took  $\theta_I = 25$  a.u. and explored  
794 varying  $\theta_E$  over a range of positive and negative values (Fig. 5A-B). The choice of thresholds  $\theta_E <$   
795  $\theta_I$  and gains  $g_E < g_I$  reflecting the asymmetry in the  $f-I$  curve of regular spiking neurons (E) and fast  
796 spiking interneurons (I) (Cruikshank et al., 2007; Nowak et al., 2003; Schiff and Reyes, 2012),  
797 facilitated that the model operated in a bistable regime (see below).

798 Input-output transfer functions are typically described as sigmoidal-shaped functions (Haider and  
799 McCormick, 2009), capturing the nonlinearities due to spike threshold and firing saturation effects.  
800 Since we are interested in modeling spontaneous activity where average population rates are low, we  
801 constrained the transfer functions to exhibit only an expanding non-linearity reflecting the threshold  
802 and thus avoid other effects that can only occur at higher rates (the contracting non-linearity tends to  
803 occur for rates  $> 30$  spikes/s (Anderson et al., 2000; Houweling et al., 2010; Nowak et al., 2003; Priebe  
804 and Ferster, 2008). In particular, we modeled  $\phi_X$  as piecewise linear (Schiff and Reyes, 2012;  
805 Stafstrom et al., 1984) but the same qualitative bistable regime can be obtained by choosing for  
806 instance a threshold-quadratic function. The model equations (Eqs. 12-14) were numerically integrated  
807 using a fourth-order Runge-Kutta method with integration time step  $dt = 0.2$  ms. U and D periods in the  
808 model were detected by threshold-based method, finding the crossing of the variable  $r_E$  with the  
809 boundary 1 Hz, where periods shorter than minimum period duration of 50 ms were merged with  
810 neighboring periods (small changes in threshold and period durations did not affect qualitatively the  
811 results).

812  
813 **Fixed points and stability.** We start by characterizing the dynamics of the system in the absence of  
814 noise. Assuming that the rates evolve much faster than the adaptation, i.e.  $\tau_E, \tau_I \ll \tau_a$ , one can  
815 partition the dynamics of the full system into (1) the dynamics of the rates assuming adaptation is  
816 constant, (2) the slow evolution of adaptation assuming the rates are constantly at equilibrium. Thus,  
817 the equations of the *nullclines* of the 2D rate dynamics at fixed  $a$ , can be obtained from the 2D system  
818 given by Eqs. 12-13. The nullclines of this reduced 2D system are obtained by setting its left hand side  
819 to zero:

$$820 \quad r_E = g_E [J_{EE} r_E - J_{EI} r_I - a - \theta_E]_+ \quad (16)$$

$$821 \quad r_I = g_I [J_{IE} r_E - J_{II} r_I - \theta_I]_+ \quad (17)$$

822  
 823 The intersection of the nullclines define the fixed points  $(r_E^*(a), r_I^*(a))$  of the 2D system to which the  
 824 rates evolve. Once there adaptation varies slowly assuming that the rates are maintained at  $(r_E^*(a), r_I^*$   
 825  $(a))$  until it reaches the equilibrium at  $a = \beta r_E^*(a)$ .

826 The network has a fixed point in  $(r_E, r_I, a) = (0, 0, 0)$  if and only if  $\theta_E \geq 0$  and  $\theta_I \geq 0$ , i.e. when the mean  
 827 external inputs are lower than the activation thresholds. The stability of this point, corresponding to the  
 828 DOWN state, further requires  $\theta_E > 0$ , thus preventing the activation of the network due to small  
 829 (infinitesimal) fluctuations in  $r_E$ . To find an UP state fixed point with non-zero rates we substitute in  
 830 Eqs. 16-17 the value of adaptation at equilibrium  $a = \beta r_E$ , assume the arguments of  $[\ ]_+$  are larger  
 831 than zero and solve for  $(r_E, r_I)$ , obtaining:

$$832 \quad r_E = \frac{1}{|M|} (J_{EI} \theta_I - J_{II}' \theta_E) \quad (18)$$

$$833 \quad r_I = \frac{1}{|M|} ((J_{EE}' - \beta) \theta_I - J_{IE} \theta_E) \quad (19)$$

834  
 835 where  $|M| = J_{EI} J_{IE} - (J_{EE}' - \beta) J_{II}'$ ,  $J_{EE}' = J_{EE} - \frac{1}{g_E}$  and  $J_{II}' = J_{II} + \frac{1}{g_I}$ .

836 The conditions for this UP state solution to exist are derived from imposing that the right hand side of  
 837 Eqs. 18-19 is positive. The stability of this solution (Eq. 21 below) implies that the determinant  $|M|$  is  
 838 positive and that if  $r_I$  is positive, then  $r_E$  is also positive. Thus, provided the stability (Eqs. 21-22), the  
 839 only condition for the solution to exist is that the right hand side of Eq. 19 is positive:

$$840 \quad \theta_E < \frac{(J_{EE}' - \beta)}{J_{IE}} \theta_I \quad (20)$$

841 Given the separation of time scales described above, this fixed point is stable if the eigenvalues of the  
 842 matrix of coefficients of Eqs. 16 and 17 without the term  $a$  (that we assume is constant) have all  
 843 negative real part. Because the coefficients matrix is 2 x 2, this is equivalent to impose that the  
 844 determinant of the matrix has a positive determinant and a negative trace. These conditions yield the  
 845 following inequalities, respectively:

$$846 \quad J_{II}' J_{EE}' < J_{EI} J_{IE} \quad (21)$$

$$847 \quad \tau_I (g_E J_{EE} + 1) < \tau_E (g_I J_{II} + 1) \quad (22)$$

848 Equation 21 is equivalent to the condition that the I-nullclines of the 2D reduced system has a larger  
 849 slope than the E-nullcline. From the U existence condition in Eq. 20 and D stability condition, it can  
 850 also be derived that  $J_{EE}' > 0$ , implying that at fixed inhibition, the E-subnetwork would be unstable (i.e.  
 851 slope of the E-nullcline is positive). In sum, the conditions for the existence of two stable U and D  
 852 states imply that the U state would be unstable in the absence of feedback inhibition but the strength  
 853 of feedback inhibition is sufficient to stabilize it. These are precisely the conditions that define an  
 854 Inhibitory Stabilized Network state (Ozeki et al., 2009).

855

856 **Phase plane analysis.** In this section we determine the different operational regimes of the network in  
 857 the  $(\theta_E, \beta)$ -plane (Fig. 5A). In the absence of noise, given that  $\theta_I \geq 0$ , a stable D state exists in the  
 858 semi-plane (Fig. 5A, violet and red regions):

$$859 \quad \theta_E > 0 \quad (23)$$

860 Provided that our choice of synaptic couplings  $J_{XY}$  and time constants hold the stability conditions  
 861 (Eqs. 21-22), the U state is stable in the semi-plane given by Eq. 20 (Fig. 5A, orange and red regions):

$$862 \quad \beta < -\frac{J_{IE}}{\theta_I} \theta_E + J_{EE}' \quad (24)$$

863 In the intersection of these two semi-planes both D and U are stable (bistable region, Fig. 5A red). In  
 864 contrast, in the complementary region to the two semi-planes, neither U nor D are stable (Fig. 5A  
 865 white region). There, a rhythmic concatenation of relatively long U and D periods is observed where  
 866 the network stays transiently in each state until adaptation triggers a transition (see e.g. Fig. 4E).  
 867 Because of the separation of time-scales, we refer to this stability to the rate dynamics but not to the  
 868 adaptation dynamics as *quasi-stable* states.

869 The addition of noise makes that some of the stable solutions now become meta-stable, meaning that  
 870 the network can switch to a different state by the action of the noise (i.e. the external fluctuations in our  
 871 model). This is the case of the bistable region (Fig. 5A red) where fluctuations generate stochastic  
 872 transitions between the two metastable U and D states (Fig. 4D). In the region of D stability  $\theta_E > 0$ , we  
 873 find a new subregion with noise-driven transitions from a metastable D state to a *quasi-stable U state*,  
 874 and back to D by the action of adaptation (Fig. 5A light violet). This subregion is delimited by the  
 875 condition that U is not stable (i.e. Eq. 24 does not hold) but *just* because of the existence of  
 876 adaptation. This can be written by saying that Eq. 24 holds if  $\beta=0$ :

$$877 \quad \theta_E < \frac{J_{EE}'}{J_{IE}} \theta_I \quad (25)$$

878  
 879 Equivalently, within the region of U stability, noise creates a new subregion with noise-driven  
 880 transitions from a metastable U state to a *quasi-stable D state*, and back to U by the recovery from  
 881 adaptation (Fig. 5A light orange). This subregion is given by the condition that there is a negative  
 882 effective threshold  $\theta_E < 0$  (i.e. caused by a supra-threshold mean external drive) but the adaptation  
 883  $a^U$  recruited in the U state is sufficient to counterbalance it:  $a^U + \theta_E > 0$ . This makes the D transiently  
 884 stable until adaptation decays back to zero. Substituting  $a^U = \beta r_E^U$  (Eq. 14) and  $r_E^U$  by the equilibrium  
 885 rate at the U state given by Eq. 18, the limit of this subregion can be expressed as (Fig. 5A, light  
 886 orange region):

$$887 \quad \beta > \frac{(J_{EE}' J_{II}' - J_{IE} J_{EI})}{J_{EI} \theta_I} \theta_E \quad (26)$$

888

## 889 **Acknowledgements**

890 We thank Zhe Chen for sharing the HMM based UP-DOWN detection related scripts, Narani van  
891 Laarhoven for sharing codes, Kenneth Harris and the members of the Compte and de la Rocha labs  
892 for helpful discussions. This work was supported by the AGAUR of the Generalitat de Catalunya (Ref:  
893 SGR14-1265), the Spanish Ministry of Economy and Competitiveness together with the European  
894 Regional Development Fund (grants BFU2009-09537, BFU2012-34838 to A.C., RYC-2011-08755 to  
895 A.R., SAF2010-15730, SAF2013-46717-R and RYC-2009-04829 to J.R.), the EU (Marie Curie grants  
896 PIRG07-GA-2010-268382 to J.R. and BIOTRACK contract PCOFUND-GA-2008-229673 to A.R.). Part  
897 of the work was carried out at the Esther Koplowitz Centre, Barcelona.

898

899

## 900 **Competing interest**

901 The authors declare that no competing interests exist.

902

903

## 904 **References**

- 905 Massi, L., Lagler, M., Hartwich, K., Borhegyi, Z., Somogyi, P., Klausberger, T., 2012. Temporal  
906 dynamics of parvalbumin-expressing axo-axonic and basket cells in the rat medial prefrontal  
907 cortex in vivo. *J Neurosci* 32, 16496–16502. doi:10.1523/JNEUROSCI.3475-12.2012 However,  
908 for the thr
- 909 Amarasingham, A., Harrison, M.T., Hatsopoulos, N.G., Geman, S., 2012. Conditional modeling and  
910 the jitter method of spike resampling. *J Neurophysiol* 107, 517–531. doi:10.1152/jn.00633.2011
- 911 Amit, D.J., Brunel, N., 1997. Model of global spontaneous activity and local structured activity during  
912 delay periods in the cerebral cortex. *Cereb Cortex* 7, 237–252. doi:10.1093/cercor/7.3.237
- 913 Anderson, J.S., Lampl, I., Gillespie, D.C., Ferster, D., 2000. The contribution of noise to contrast  
914 invariance of orientation tuning in cat visual cortex. *Science* 290, 1968–1972.
- 915 Angeli, D., Ferrell, J.E., Sontag, E.D., 2004. Detection of multistability, bifurcations, and hysteresis in a  
916 large class of biological positive-feedback systems. *Proc Natl Acad Sci U S A* 101, 1822–1827.  
917 doi:10.1073/pnas.0308265100
- 918 Barbieri, F., Brunel, N., 2007. Irregular persistent activity induced by synaptic excitatory feedback.  
919 *Front Comput Neurosci* 1, 5. doi:10.3389/neuro.10.005.2007
- 920 Barthó, P., Hirase, H., Monconduit, L., Zugaro, M., Harris, K.D., Buzsáki, G., 2004. Characterization of  
921 neocortical principal cells and interneurons by network interactions and extracellular features. *J*  
922 *Neurophysiol* 92, 600–608. doi:10.1152/jn.01170.2003
- 923 Battaglia, F.P., Sutherland, G.R., McNaughton, B.L., 2004. Hippocampal sharp wave bursts coincide  
924 with neocortical “up-state” transitions. *Learn Mem* 11, 697–704. doi:10.1101/lm.73504
- 925 Bazhenov, M., Timofeev, I., Steriade, M., Sejnowski, T.J., 2002. Model of thalamocortical slow-wave

- 926 sleep oscillations and transitions to activated States. *J Neurosci* 22, 8691–8704.
- 927 Beltramo, R., D’Urso, G., Dal Maschio, M., Farisello, P., Bovetti, S., Clovis, Y., Lassi, G., Tucci, V., De  
928 Pietri Tonelli, D., Fellin, T., 2013. Layer-specific excitatory circuits differentially control recurrent  
929 network dynamics in the neocortex. *Nat Neurosci* 16, 227–234. doi:10.1038/nn.3306
- 930 Benita, J.M., Guillamon, A., Deco, G., Sanchez-Vives, M.V., 2012. Synaptic depression and slow  
931 oscillatory activity in a biophysical network model of the cerebral cortex. *Front Comput*  
932 *Neurosci* 6, 64. doi:10.3389/fncom.2012.00064
- 933 Brunel, N., 2000a. Persistent activity and the single-cell frequency-current curve in a cortical network  
934 model. *Network* 11, 261–280.
- 935 Brunel, N., 2000b. Dynamics of sparsely connected networks of excitatory and inhibitory spiking  
936 neurons. *J Comput Neurosci* 8, 183–208.
- 937 Chauvette, S., Crochet, S., Volgushev, M., Timofeev, I., 2011. Properties of slow oscillation during  
938 slow-wave sleep and anesthesia in cats. *J Neurosci* 31, 14998–15008.  
939 doi:10.1523/JNEUROSCI.2339-11.2011
- 940 Chauvette, S., Volgushev, M., Timofeev, I., 2010. Origin of active states in local neocortical networks  
941 during slow sleep oscillation. *Cereb Cortex* 20, 2660–2674. doi:10.1093/cercor/bhq009
- 942 Chen, J.-Y., Chauvette, S., Skorheim, S., Timofeev, I., Bazhenov, M., 2012. Interneuron-mediated  
943 inhibition synchronizes neuronal activity during slow oscillation. *J Physiol (Lond)* 590, 3987–  
944 4010. doi:10.1113/jphysiol.2012.227462
- 945 Chen, Z., Vijayan, S., Barbieri, R., Wilson, M.A., Brown, E.N., 2009. Discrete- and continuous-time  
946 probabilistic models and algorithms for inferring neuronal UP and DOWN states. *Neural*  
947 *Comput* 21, 1797–1862. doi:10.1162/neco.2009.06-08-799
- 948 Clement, E.A., Richard, A., Thwaites, M., Ailon, J., Peters, S., Dickson, C.T., 2008. Cyclic and sleep-  
949 like spontaneous alternations of brain state under urethane anaesthesia. *PLoS ONE* 3, e2004.  
950 doi:10.1371/journal.pone.0002004
- 951 Compte, A., 2006. Computational and in vitro studies of persistent activity: edging towards cellular and  
952 synaptic mechanisms of working memory. *Neuroscience* 139, 135–151.  
953 doi:10.1016/j.neuroscience.2005.06.011
- 954 Compte, A., Constantinidis, C., Tegner, J., Raghavachari, S., Chafee, M.V., Goldman-Rakic, P.S.,  
955 Wang, X.-J., 2003a. Temporally irregular mnemonic persistent activity in prefrontal neurons of  
956 monkeys during a delayed response task. *J Neurophysiol* 90, 3441–3454.  
957 doi:10.1152/jn.00949.2002
- 958 Compte, A., Reig, R., Descalzo, V.F., Harvey, M.A., Puccini, G.D., Sanchez-Vives, M.V., 2008.  
959 Spontaneous high-frequency (10-80 Hz) oscillations during up states in the cerebral cortex in  
960 vitro. *J Neurosci* 28, 13828–13844. doi:10.1523/JNEUROSCI.2684-08.2008
- 961 Compte, A., Sanchez-Vives, M.V., McCormick, D.A., Wang, X.-J., 2003b. Cellular and network  
962 mechanisms of slow oscillatory activity (<1 Hz) and wave propagations in a cortical network

- 963 model. *J Neurophysiol* 89, 2707–2725. doi:10.1152/jn.00845.2002
- 964 Constantinople, C.M., Bruno, R.M., 2011. Effects and mechanisms of wakefulness on local cortical  
965 networks. *Neuron* 69, 1061–1068. doi:10.1016/j.neuron.2011.02.040
- 966 Contreras, D., Steriade, M., 1995. Cellular basis of EEG slow rhythms: a study of dynamic  
967 corticothalamic relationships. *J Neurosci* 15, 604–622.
- 968 Contreras, D., Timofeev, I., Steriade, M., 1996. Mechanisms of long-lasting hyperpolarizations  
969 underlying slow sleep oscillations in cat corticothalamic networks. *J Physiol (Lond)* 494 ( Pt 1),  
970 251–264.
- 971 Cossart, R., Aronov, D., Yuste, R., 2003. Attractor dynamics of network UP states in the neocortex.  
972 *Nature* 423, 283–288. doi:10.1038/nature01614
- 973 Cowan, R.L., Wilson, C.J., 1994. Spontaneous firing patterns and axonal projections of single  
974 corticostriatal neurons in the rat medial agranular cortex. *J Neurophysiol* 71, 17–32.
- 975 Cruikshank, S.J., Lewis, T.J., Connors, B.W., 2007. Synaptic basis for intense thalamocortical  
976 activation of feedforward inhibitory cells in neocortex. *Nat Neurosci* 10, 462–468.  
977 doi:10.1038/nn1861
- 978 Crunelli, V., David, F., Lőrincz, M.L., Hughes, S.W., 2015. The thalamocortical network as a single  
979 slow wave-generating unit. *Curr Opin Neurobiol* 31, 72–80. doi:10.1016/j.conb.2014.09.001
- 980 Crunelli, V., Hughes, S.W., 2010. The slow (<1 Hz) rhythm of non-REM sleep: a dialogue between  
981 three cardinal oscillators. *Nat Neurosci* 13, 9–17. doi:10.1038/nn.2445
- 982 Csicsvari, J., Hirase, H., Czurko, A., Buzsáki, G., 1998. Reliability and state dependence of pyramidal  
983 cell-interneuron synapses in the hippocampus: an ensemble approach in the behaving rat.  
984 *Neuron* 21, 179–189.
- 985 Cunningham, M.O., Pervouchine, D.D., Racca, C., Kopell, N.J., Davies, C.H., Jones, R.S.G., Traub,  
986 R.D., Whittington, M.A., 2006. Neuronal metabolism governs cortical network response state.  
987 *Proc Natl Acad Sci U S A* 103, 5597–5601. doi:10.1073/pnas.0600604103
- 988 Curto, C., Sakata, S., Marguet, S., Itskov, V., Harris, K.D., 2009. A simple model of cortical dynamics  
989 explains variability and state dependence of sensory responses in urethane-anesthetized  
990 auditory cortex. *J Neurosci* 29, 10600–10612. doi:10.1523/JNEUROSCI.2053-09.2009
- 991 Dao Duc, K., Parutto, P., Chen, X., Epsztein, J., Konnerth, A., Holcman, D., 2015. Synaptic dynamics  
992 and neuronal network connectivity are reflected in the distribution of times in Up states. *Front*  
993 *Comput Neurosci* 9, 96. doi:10.3389/fncom.2015.00096
- 994 David, F., Schmiedt, J.T., Taylor, H.L., Orban, G., Di Giovanni, G., Uebele, V.N., Renger, J.J.,  
995 Lambert, R.C., Leresche, N., Crunelli, V., 2013. Essential thalamic contribution to slow waves  
996 of natural sleep. *J Neurosci* 33, 19599–19610. doi:10.1523/JNEUROSCI.3169-13.2013
- 997 Deco, G., Martí, D., Ledberg, A., Reig, R., Sanchez Vives, M.V., 2009. Effective reduced diffusion-  
998 models: a data driven approach to the analysis of neuronal dynamics. *PLoS Comput Biol* 5,  
999 e1000587. doi:10.1371/journal.pcbi.1000587



- 1000 Destexhe, A., 2009. Self-sustained asynchronous irregular states and Up-Down states in thalamic,  
1001 cortical and thalamocortical networks of nonlinear integrate-and-fire neurons. *J Comput*  
1002 *Neurosci* 27, 493–506. doi:10.1007/s10827-009-0164-4
- 1003 Détári, L., Vanderwolf, C.H., 1987. Activity of identified cortically projecting and other basal forebrain  
1004 neurones during large slow waves and cortical activation in anaesthetized rats. *Brain Res* 437,  
1005 1–8.
- 1006 DeWeese, M.R., Zador, A.M., 2006. Non-Gaussian membrane potential dynamics imply sparse,  
1007 synchronous activity in auditory cortex. *J Neurosci* 26, 12206–12218.  
1008 doi:10.1523/JNEUROSCI.2813-06.2006
- 1009 Durstewitz, D., 2009. Implications of synaptic biophysics for recurrent network dynamics and active  
1010 memory. *Neural Netw* 22, 1189–1200. doi:10.1016/j.neunet.2009.07.016
- 1011 Engel, T.A., Steinmetz, N.A., Boahen, K., Moore, T., 2013. Highly synchronized slow activity  
1012 fluctuations in a single column of macaque area V4. Society for Neuroscience, San Diego, CA.
- 1013 Erchova, I.A., Lebedev, M.A., Diamond, M.E., 2002. Somatosensory cortical neuronal population  
1014 activity across states of anaesthesia. *Eur J Neurosci* 15, 744–752.
- 1015 Fanselow, E.E., Connors, B.W., 2010. The roles of somatostatin-expressing (GIN) and fast-spiking  
1016 inhibitory interneurons in UP-DOWN states of mouse neocortex. *J Neurophysiol* 104, 596–606.  
1017 doi:10.1152/jn.00206.2010
- 1018 Fujisawa, S., Amarasingham, A., Harrison, M.T., Buzsáki, G., 2008. Behavior-dependent short-term  
1019 assembly dynamics in the medial prefrontal cortex. *Nat Neurosci* 11, 823–833.  
1020 doi:10.1038/nn.2134
- 1021 Gentet, L.J., Kremer, Y., Taniguchi, H., Huang, Z.J., Staiger, J.F., Petersen, C.C.H., 2012. Unique  
1022 functional properties of somatostatin-expressing GABAergic neurons in mouse barrel cortex.  
1023 *Nat Neurosci* 15, 607–612. doi:10.1038/nn.3051
- 1024 Haider, B., Duque, A., Hasenstaub, A.R., McCormick, D.A., 2006. Neocortical network activity in vivo  
1025 is generated through a dynamic balance of excitation and inhibition. *J Neurosci* 26, 4535–4545.  
1026 doi:10.1523/JNEUROSCI.5297-05.2006
- 1027 Haider, B., Häusser, M., Carandini, M., 2013. Inhibition dominates sensory responses in the awake  
1028 cortex. *Nature* 493, 97–100. doi:10.1038/nature11665
- 1029 Haider, B., McCormick, D.A., 2009. Rapid neocortical dynamics: cellular and network mechanisms.  
1030 *Neuron* 62, 171–189. doi:10.1016/j.neuron.2009.04.008
- 1031 Hansel, D., Mato, G., 2013. Short-term plasticity explains irregular persistent activity in working  
1032 memory tasks. *J Neurosci* 33, 133–149. doi:10.1523/JNEUROSCI.3455-12.2013
- 1033 Harris, K.D., Henze, D.A., Csicsvari, J., Hirase, H., Buzsáki, G., 2000. Accuracy of tetrode spike  
1034 separation as determined by simultaneous intracellular and extracellular measurements. *J*  
1035 *Neurophysiol* 84, 401–414.
- 1036 Harris, K.D., Thiele, A., 2011. Cortical state and attention. *Nat Rev Neurosci* 12, 509–523.

- 1037           doi:10.1038/nrn3084
- 1038   Hasenstaub, A., Sachdev, R.N.S., McCormick, D.A., 2007. State changes rapidly modulate cortical  
1039           neuronal responsiveness. *J Neurosci* 27, 9607–9622. doi:10.1523/JNEUROSCI.2184-07.2007
- 1040   Hill, S., Tononi, G., 2005. Modeling sleep and wakefulness in the thalamocortical system. *J*  
1041           *Neurophysiol* 93, 1671–1698. doi:10.1152/jn.00915.2004
- 1042   Holcman, D., Tsodyks, M., 2006. The emergence of Up and Down states in cortical networks. *PLoS*  
1043           *Comput Biol* 2, e23. doi:10.1371/journal.pcbi.0020023
- 1044   Holt, G.R., Softky, W.R., Koch, C., Douglas, R.J., 1996. Comparison of discharge variability in vitro  
1045           and in vivo in cat visual cortex neurons. *J Neurophysiol* 75, 1806–1814.
- 1046   Houweling, A.R., Doron, G., Voigt, B.C., Herfst, L.J., Brecht, M., 2010. Nanostimulation: manipulation  
1047           of single neuron activity by juxtacellular current injection. *J Neurophysiol* 103, 1696–1704.  
1048           doi:10.1152/jn.00421.2009
- 1049   Hughes, S.W., Cope, D.W., Blethyn, K.L., Crunelli, V., 2002. Cellular mechanisms of the slow (<1 Hz)  
1050           oscillation in thalamocortical neurons in vitro. *Neuron* 33, 947–958.
- 1051   Ji, D., Wilson, M.A., 2007. Coordinated memory replay in the visual cortex and hippocampus during  
1052           sleep. *Nat Neurosci* 10, 100–107. doi:10.1038/nn1825
- 1053   Johnson, L.A., Euston, D.R., Tatsuno, M., McNaughton, B.L., 2010. Stored-trace reactivation in rat  
1054           prefrontal cortex is correlated with down-to-up state fluctuation density. *J Neurosci* 30, 2650–  
1055           2661. doi:10.1523/JNEUROSCI.1617-09.2010
- 1056   Kumar, A., Schrader, S., Aertsen, A., Rotter, S., 2008. The high-conductance state of cortical  
1057           networks. *Neural Comput* 20, 1–43. doi:10.1162/neco.2008.20.1.1
- 1058   Lamp, I., Reichova, I., Ferster, D., 1999. Synchronous membrane potential fluctuations in neurons of  
1059           the cat visual cortex. *Neuron* 22, 361–374.
- 1060   Latham, P.E., Richmond, B.J., Nelson, P.G., Nirenberg, S., 2000. Intrinsic dynamics in neuronal  
1061           networks. I. Theory. *J Neurophysiol* 83, 808–827.
- 1062   Le Bon-Jego, M., Yuste, R., 2007. Persistently active, pacemaker-like neurons in neocortex. *Front*  
1063           *Neurosci* 1, 123–129. doi:10.3389/neuro.01.1.1.009.2007
- 1064   Lemieux, M., Chen, J.-Y., Lonjers, P., Bazhenov, M., Timofeev, I., 2014. The impact of cortical  
1065           deafferentation on the neocortical slow oscillation. *J Neurosci* 34, 5689–5703.  
1066           doi:10.1523/JNEUROSCI.1156-13.2014
- 1067   Lewis, L.D., Voigts, J., Flores, F.J., Schmitt, L.I., Wilson, M.A., Halassa, M.M., Brown, E.N., 2015.  
1068           Thalamic reticular nucleus induces fast and local modulation of arousal state. *elife* 4, e08760.  
1069           doi:10.7554/eLife.08760
- 1070   Lim, S., Rinzel, J., 2010. Noise-induced transitions in slow wave neuronal dynamics. *J Comput*  
1071           *Neurosci* 28, 1–17. doi:10.1007/s10827-009-0178-y
- 1072   Luczak, A., Barthó, P., 2012. Consistent sequential activity across diverse forms of UP states under  
1073           ketamine anesthesia. *Eur J Neurosci* 36, 2830–2838. doi:10.1111/j.1460-9568.2012.08201.x

- 1074 Luczak, A., Barthó, P., Harris, K.D., 2009. Spontaneous events outline the realm of possible sensory  
1075 responses in neocortical populations. *Neuron* 62, 413–425. doi:10.1016/j.neuron.2009.03.014
- 1076 Luczak, A., Barthó, P., Marguet, S.L., Buzsáki, G., Harris, K.D., 2007. Sequential structure of  
1077 neocortical spontaneous activity in vivo. *Proc Natl Acad Sci U S A* 104, 347–352.  
1078 doi:10.1073/pnas.0605643104
- 1079 Luczak, A., McNaughton, B.L., Harris, K.D., 2015. Packet-based communication in the cortex. *Nat Rev*  
1080 *Neurosci* 16, 745–755. doi:10.1038/nrn4026
- 1081 Mann, E.O., Kohl, M.M., Paulsen, O., 2009. Distinct roles of GABA(A) and GABA(B) receptors in  
1082 balancing and terminating persistent cortical activity. *J Neurosci* 29, 7513–7518.  
1083 doi:10.1523/JNEUROSCI.6162-08.2009
- 1084 Massi, L., Lagler, M., Hartwich, K., Borhegyi, Z., Somogyi, P., Klausberger, T., 2012. Temporal  
1085 dynamics of parvalbumin-expressing axo-axonic and basket cells in the rat medial prefrontal  
1086 cortex in vivo. *J Neurosci* 32, 16496–16502. doi:10.1523/JNEUROSCI.3475-12.2012
- 1087 Mattia, M., Sanchez-Vives, M.V., 2012. Exploring the spectrum of dynamical regimes and timescales  
1088 in spontaneous cortical activity. *Cogn Neurodyn* 6, 239–250. doi:10.1007/s11571-011-9179-4
- 1089 McCormick, D.A., Connors, B.W., Lighthall, J.W., Prince, D.A., 1985. Comparative electrophysiology of  
1090 pyramidal and sparsely spiny stellate neurons of the neocortex. *J Neurophysiol* 54, 782–806.
- 1091 McCormick, D.A., Pape, H.C., 1990. Properties of a hyperpolarization-activated cation current and its  
1092 role in rhythmic oscillation in thalamic relay neurones. *J Physiol (Lond)* 431, 291–318.
- 1093 Mejias, J.F., Kappen, H.J., Torres, J.J., 2010. Irregular dynamics in up and down cortical states. *PLoS*  
1094 *ONE* 5, e13651. doi:10.1371/journal.pone.0013651
- 1095 Mochol, G., Hermoso-Mendizabal, A., Sakata, S., Harris, K.D., de la Rocha, J., 2015. Stochastic  
1096 transitions into silence cause noise correlations in cortical circuits. *Proc Natl Acad Sci U S A*  
1097 112, 3529–3534. doi:10.1073/pnas.1410509112
- 1098 Mongillo, G., Barak, O., Tsodyks, M., 2008. Synaptic theory of working memory. *Science* 319, 1543–  
1099 1546. doi:10.1126/science.1150769
- 1100 Mongillo, G., Hansel, D., van Vreeswijk, C., 2012. Bistability and spatiotemporal irregularity in neuronal  
1101 networks with nonlinear synaptic transmission. *Phys Rev Lett* 108, 158101.  
1102 doi:10.1103/PhysRevLett.108.158101
- 1103 Moreno-Bote, R., Rinzel, J., Rubin, N., 2007. Noise-induced alternations in an attractor network model  
1104 of perceptual bistability. *J Neurophysiol* 98, 1125–1139. doi:10.1152/jn.00116.2007
- 1105 Mukovski, M., Chauvette, S., Timofeev, I., Volgushev, M., 2007. Detection of active and silent states in  
1106 neocortical neurons from the field potential signal during slow-wave sleep. *Cereb Cortex* 17,  
1107 400–414. doi:10.1093/cercor/bhj157
- 1108 Murakami, M., Kashiwadani, H., Kirino, Y., Mori, K., 2005. State-dependent sensory gating in olfactory  
1109 cortex. *Neuron* 46, 285–296. doi:10.1016/j.neuron.2005.02.025
- 1110 Nowak, L.G., Azouz, R., Sanchez-Vives, M.V., Gray, C.M., McCormick, D.A., 2003.

- 1111            Electrophysiological classes of cat primary visual cortical neurons in vivo as revealed by  
1112            quantitative analyses. *J Neurophysiol* 89, 1541–1566. doi:10.1152/jn.00580.2002
- 1113    Ozeki, H., Finn, I.M., Schaffer, E.S., Miller, K.D., Ferster, D., 2009. Inhibitory stabilization of the cortical  
1114            network underlies visual surround suppression. *Neuron* 62, 578–592.  
1115            doi:10.1016/j.neuron.2009.03.028
- 1116    Parga, N., Abbott, L.F., 2007. Network model of spontaneous activity exhibiting synchronous  
1117            transitions between up and down States. *Front Neurosci* 1, 57–66.  
1118            doi:10.3389/neuro.01.1.1.004.2007
- 1119    Petersen, C.C.H., Hahn, T.T.G., Mehta, M., Grinvald, A., Sakmann, B., 2003. Interaction of sensory  
1120            responses with spontaneous depolarization in layer 2/3 barrel cortex. *Proc Natl Acad Sci U S A*  
1121            100, 13638–13643. doi:10.1073/pnas.2235811100
- 1122    Poskanzer, K.E., Yuste, R., 2011. Astrocytic regulation of cortical UP states. *Proc Natl Acad Sci U S A*  
1123            108, 18453–18458. doi:10.1073/pnas.1112378108
- 1124    Priebe, N.J., Ferster, D., 2008. Inhibition, spike threshold, and stimulus selectivity in primary visual  
1125            cortex. *Neuron* 57, 482–497. doi:10.1016/j.neuron.2008.02.005
- 1126    Renart, A., de la Rocha, J., Bartho, P., Hollender, L., Parga, N., Reyes, A., Harris, K.D., 2010. The  
1127            asynchronous state in cortical circuits. *Science* 327, 587–590. doi:10.1126/science.1179850
- 1128    Renart, A., Moreno-Bote, R., Wang, X.-J., Parga, N., 2007. Mean-driven and fluctuation-driven  
1129            persistent activity in recurrent networks. *Neural Comput* 19, 1–46.  
1130            doi:10.1162/neco.2007.19.1.1
- 1131    Rigas, P., Castro-Alamancos, M.A., 2007. Thalamocortical Up states: differential effects of intrinsic  
1132            and extrinsic cortical inputs on persistent activity. *J Neurosci* 27, 4261–4272.  
1133            doi:10.1523/JNEUROSCI.0003-07.2007
- 1134    Rinzel, J., Lee, Y.S., 1987. Dissection of a model for neuronal parabolic bursting. *J Math Biol* 25, 653–  
1135            675.
- 1136    Roxin, A., Hakim, V., Brunel, N., 2008. The statistics of repeating patterns of cortical activity can be  
1137            reproduced by a model network of stochastic binary neurons. *J Neurosci* 28, 10734–10745.  
1138            doi:10.1523/JNEUROSCI.1016-08.2008
- 1139    Ruiz-Mejias, M., Ciria-Suarez, L., Mattia, M., Sanchez-Vives, M.V., 2011. Slow and fast rhythms  
1140            generated in the cerebral cortex of the anesthetized mouse. *J Neurophysiol* 106, 2910–2921.  
1141            doi:10.1152/jn.00440.2011
- 1142    Sachidhanandam, S., Sreenivasan, V., Kyriakatos, A., Kremer, Y., Petersen, C.C.H., 2013. Membrane  
1143            potential correlates of sensory perception in mouse barrel cortex. *Nat Neurosci* 16, 1671–1677.  
1144            doi:10.1038/nn.3532
- 1145    Sakata, S., Harris, K.D., 2009. Laminar structure of spontaneous and sensory-evoked population  
1146            activity in auditory cortex. *Neuron* 64, 404–418. doi:10.1016/j.neuron.2009.09.020
- 1147    Saleem, A.B., Chadderton, P., Aperia-Schoute, J., Harris, K.D., Schultz, S.R., 2010. Methods for

- 1148 predicting cortical UP and DOWN states from the phase of deep layer local field potentials. *J*  
1149 *Comput Neurosci* 29, 49–62. doi:10.1007/s10827-010-0228-5
- 1150 Sanchez-Vives, M.V., McCormick, D.A., 2000. Cellular and network mechanisms of rhythmic recurrent  
1151 activity in neocortex. *Nat Neurosci* 3, 1027–1034. doi:10.1038/79848
- 1152 Schiff, M.L., Reyes, A.D., 2012. Characterization of thalamocortical responses of regular-spiking and  
1153 fast-spiking neurons of the mouse auditory cortex in vitro and in silico. *J Neurophysiol* 107,  
1154 1476–1488. doi:10.1152/jn.00208.2011
- 1155 Shu, Y., Hasenstaub, A., McCormick, D.A., 2003. Turning on and off recurrent balanced cortical  
1156 activity. *Nature* 423, 288–293. doi:10.1038/nature01616
- 1157 Sirota, A., Montgomery, S., Fujisawa, S., Isomura, Y., Zugaro, M., Buzsáki, G., 2008. Entrainment of  
1158 neocortical neurons and gamma oscillations by the hippocampal theta rhythm. *Neuron* 60,  
1159 683–697. doi:10.1016/j.neuron.2008.09.014
- 1160 Slézia, A., Hangya, B., Ulbert, I., Acsády, L., 2011. Phase advancement and nucleus-specific timing of  
1161 thalamocortical activity during slow cortical oscillation. *J Neurosci* 31, 607–617.  
1162 doi:10.1523/JNEUROSCI.3375-10.2011
- 1163 Stafstrom, C.E., Schwindt, P.C., Crill, W.E., 1984. Repetitive firing in layer V neurons from cat  
1164 neocortex in vitro. *J Neurophysiol* 52, 264–277.
- 1165 Steriade, M., Contreras, D., Amzica, F., 1994. Synchronized sleep oscillations and their paroxysmal  
1166 developments. *Trends Neurosci* 17, 199–208.
- 1167 Steriade, M., Nuñez, A., Amzica, F., 1993a. A novel slow (< 1 Hz) oscillation of neocortical neurons in  
1168 vivo: depolarizing and hyperpolarizing components. *J Neurosci* 13, 3252–3265.
- 1169 Steriade, M., Nuñez, A., Amzica, F., 1993b. Intracellular analysis of relations between the slow (< 1  
1170 Hz) neocortical oscillation and other sleep rhythms of the electroencephalogram. *J Neurosci*  
1171 13, 3266–3283.
- 1172 Steriade, M., Timofeev, I., Grenier, F., 2001. Natural waking and sleep states: a view from inside  
1173 neocortical neurons. *J Neurophysiol* 85, 1969–1985.
- 1174 Stern, E.A., Jaeger, D., Wilson, C.J., 1998. Membrane potential synchrony of simultaneously recorded  
1175 striatal spiny neurons in vivo. *Nature* 394, 475–478. doi:10.1038/28848
- 1176 Stern, E.A., Kincaid, A.E., Wilson, C.J., 1997. Spontaneous subthreshold membrane potential  
1177 fluctuations and action potential variability of rat corticostriatal and striatal neurons in vivo. *J*  
1178 *Neurophysiol* 77, 1697–1715.
- 1179 Stroh, A., Adelsberger, H., Groh, A., Rühlmann, C., Fischer, S., Schierloh, A., Deisseroth, K.,  
1180 Konnerth, A., 2013. Making waves: initiation and propagation of corticothalamic Ca<sup>2+</sup> waves in  
1181 vivo. *Neuron* 77, 1136–1150. doi:10.1016/j.neuron.2013.01.031
- 1182 Tabak, J., Rinzel, J., Bertram, R., 2011. Quantifying the relative contributions of divisive and  
1183 subtractive feedback to rhythm generation. *PLoS Comput Biol* 7, e1001124.  
1184 doi:10.1371/journal.pcbi.1001124

- 1185 Tabak, J., Senn, W., O'Donovan, M.J., Rinzel, J., 2000. Modeling of spontaneous activity in  
1186 developing spinal cord using activity-dependent depression in an excitatory network. *J*  
1187 *Neurosci* 20, 3041–3056.
- 1188 Tan, A.Y.Y., Andoni, S., Priebe, N.J., 2013. A spontaneous state of weakly correlated synaptic  
1189 excitation and inhibition in visual cortex. *Neuroscience* 247, 364–375.  
1190 doi:10.1016/j.neuroscience.2013.05.037
- 1191 Taub, A.H., Katz, Y., Lampl, I., 2013. Cortical balance of excitation and inhibition is regulated by the  
1192 rate of synaptic activity. *J Neurosci* 33, 14359–14368. doi:10.1523/JNEUROSCI.1748-13.2013
- 1193 Timofeev, I., Grenier, F., Bazhenov, M., Sejnowski, T.J., Steriade, M., 2000. Origin of slow cortical  
1194 oscillations in deafferented cortical slabs. *Cereb Cortex* 10, 1185–1199.
- 1195 Timofeev, I., Grenier, F., Steriade, M., 2001. Disfacilitation and active inhibition in the neocortex during  
1196 the natural sleep-wake cycle: an intracellular study. *Proc Natl Acad Sci U S A* 98, 1924–1929.  
1197 doi:10.1073/pnas.041430398
- 1198 Tsodyks, M., Uziel, A., Markram, H., 2000. Synchrony generation in recurrent networks with  
1199 frequency-dependent synapses. *J Neurosci* 20, RC50.
- 1200 Tsodyks, M.V., Skaggs, W.E., Sejnowski, T.J., McNaughton, B.L., 1997. Paradoxical effects of  
1201 external modulation of inhibitory interneurons. *J Neurosci* 17, 4382–4388.
- 1202 Ushimaru, M., Ueta, Y., Kawaguchi, Y., 2012. Differentiated participation of thalamocortical  
1203 subnetworks in slow/spindle waves and desynchronization. *J Neurosci* 32, 1730–1746.  
1204 doi:10.1523/JNEUROSCI.4883-11.2012
- 1205 Van Vreeswijk, C., Sompolinsky, H., 1998. Chaotic balanced state in a model of cortical circuits.  
1206 *Neural Comput* 10, 1321–1371.
- 1207 Vogels, T.P., Abbott, L.F., 2005. Signal propagation and logic gating in networks of integrate-and-fire  
1208 neurons. *J Neurosci* 25, 10786–10795. doi:10.1523/JNEUROSCI.3508-05.2005
- 1209 Vyazovskiy, V.V., Olcese, U., Hanlon, E.C., Nir, Y., Cirelli, C., Tononi, G., 2011. Local sleep in awake  
1210 rats. *Nature* 472, 443–447. doi:10.1038/nature10009
- 1211 Wang, X.J., 2001. Synaptic reverberation underlying mnemonic persistent activity. *Trends Neurosci*  
1212 24, 455–463. doi:10.1016/S0166-2236(00)01868-3
- 1213 Waters, J., Helmchen, F., 2006. Background synaptic activity is sparse in neocortex. *J Neurosci* 26,  
1214 8267–8277. doi:10.1523/JNEUROSCI.2152-06.2006
- 1215 Whitten, T.A., Martz, L.J., Guico, A., Gervais, N., Dickson, C.T., 2009. Heat synch: inter- and  
1216 independence of body-temperature fluctuations and brain-state alternations in urethane-  
1217 anesthetized rats. *J Neurophysiol* 102, 1647–1656. doi:10.1152/jn.00374.2009
- 1218 Wilson, H.R., Cowan, J.D., 1972. Excitatory and inhibitory interactions in localized populations of  
1219 model neurons. *Biophys J* 12, 1–24. doi:10.1016/S0006-3495(72)86068-5
- 1220
